# Supplementary material for: Development of a Multi-Epitope Universal mRNA Vaccine Candidate for Monkeypox, Smallpox, and Vaccinia Viruses: Design and In Silico Analyses
Source: MDPI journal article supplement (doi:10.3390/v15051120), 2023-05-07
Supplement: s1 [file s1]

## Supplementary materials

### Open reading frame amino acid sequence of monkeypox multi-epitope mRNA vaccine construct

MDAMKRGLCCVLLLCGAVFVSPSVPPGEDSKDVAAPHRQPLTSSERIDKQIRYILDGISALRKETCNKS  
NMCESSKEALAENNLNLPKMAEKDGCFSQSGFNEETCLVKIITGLLEFEVYLEYLQNRFSSESSEEQARAV  
QMSTKVLIQFLQKKAKNLDAITTPDPTTNASLLTKLQAQNQWLQDMTTHLILRSFKEFLQSSLRALRQ  
MGGGSAKFVAAWTLKAAAEAAAKVQTGRKKDGGDNKKSISGGTPAKKQDVNDTISDKKGPNNTR  
KKSTHRKVASSTTQYDHHKKPITKTTSDYQSDVSQEVKKEEQTSKKVSELYNKPLYKKEEKNNGTS  
WNDTVKKPDDDETDL SKLSKD KKEANASKKQTSVNTKKAPRQVGGGSTLFPGDDDLGGGSTLTKQRLT  
NLGGGSTLRAAMISLGGGSFFIVVATAAVCLLFIGGGSMNSLSIFFIVVATAAVCLLFIGGGSATAAVCLL  
FIQGYSIYENYGNGGGSLSMITMSAFLIVRLNGGGSRVIGLCIRISMVISLGGGSSAFLIVRLNQCMSAN  
GGGSASYISCTANSWNVIPGGGSGGVIHLSCKSGFILTGGGSMKTISVVTLLCVLPAGGGSGVIFLISVI  
VLVCSCNGGGSKIQNVIIDECYGGGSAALFMYYAKRGGGSNTLSERISSKHHHHHH

|                       |                                                                                                                                                                                                        |
|-----------------------|--------------------------------------------------------------------------------------------------------------------------------------------------------------------------------------------------------|
| Signal peptide of TPA | MDAMKRGLCCVLLLCGAVFVSPS                                                                                                                                                                                |
| IL-6                  | VPPGEDSKDVAAPHRQPLTSSERIDKQIRYILDGISALRKETCNKSNMC<br>ESSKEALAENNLNLPKMAEKDGCFSQSGFNEETCLVKIITGLLEFEVYL<br>EYLQNRFSSESSEEQARAVQMSTKVLIQFLQKKAKNLDAITTPDPTTNAS<br>LLTKLQAQNQWLQDMTTHLILRSFKEFLQSSLRALRQM |
| PADRE                 | AKFVAAWTLKAAA                                                                                                                                                                                          |

### Conserved sequences of antigens which were used to find and predict corresponding epitopes

#### A29L/A30L/A27L:

MDGTLFPGDDDLAIPATEFFST;  
KREAIVKA;  
DDNEETLKQRLTNLEKKITN;  
TTKFEQIEKCCK;  
NDEVLFRLNHAETLRAAMISLAKKIDVQTGR.

#### A30L/A31L/A28L:

MNSLSIFFIVVATAAVCLLFIQ;  
YSIYENYGNIFEKNATHAAFEYSKISGGTPALDRRVQDVND;  
ISDVKKQWRCV;  
YPGNGFVSASIFGFQAEVGPNNTRSIKFNMTM;  
QCIDFTFSDVINI;  
IYNPC;  
PNINN;  
ECQFLKSVL.

#### A35R/A36R/A33R:

MMTPENDEEQTSVFSATVY;  
DKIQGKNKRKRIGLCIRISMVISLLSMITMSAFLIVRLNQCMSAN;  
AAITD.

**B6R/B7R/B5R:**

MKTISVVTLCLVLPVAVYSTCTVPTMNNAKLTSTETSFN;  
QKVTFTCD;  
DPNAVCECTDKWKYENPCKKMCTVSDY;  
KPLYEVNSTMTLSCNGETKYFRC;  
EKNGNTSWNDTVTCPNAECQPLQLEHGSCQPVKEKYSFGEY;  
TINCDVGYEYVIG;  
YISCTANSWNVIPSCQQKCD;  
PSLSNGLISGSTFSIGGVHLSCKSGF;  
LTGSPSSTCIDGKWNP;  
FDPVDDGPDDDETDLKLSKDVVQYEQEIESLEATYHIII;  
ALTIMGVIFLIS;  
IVLVCSCDKNNDQYKFHKLLL.

**M1R/M1R/L1R:**

MGAAASIQTTVNTLSEISSKLEQEANASAQTKCDIEIGNFYIRQNHGCNITVKNMCSADADAQLDAVLSAATE  
TYSGLTPEQKAYVPAMFTAALNIQTSVNTVVRDFENYVKQTCNSSAVVDNKLKIQNVIIDECYGAPGSPTNLEF  
INTGSSKGNCAIKALMQLTTKATTQIAP;  
QVAGTGVQFYMIVIGVHILAALFMYYAKRMLFTSTNDKIKLILANKENVHWTTYMDTFFRTSPM;  
IIATTD

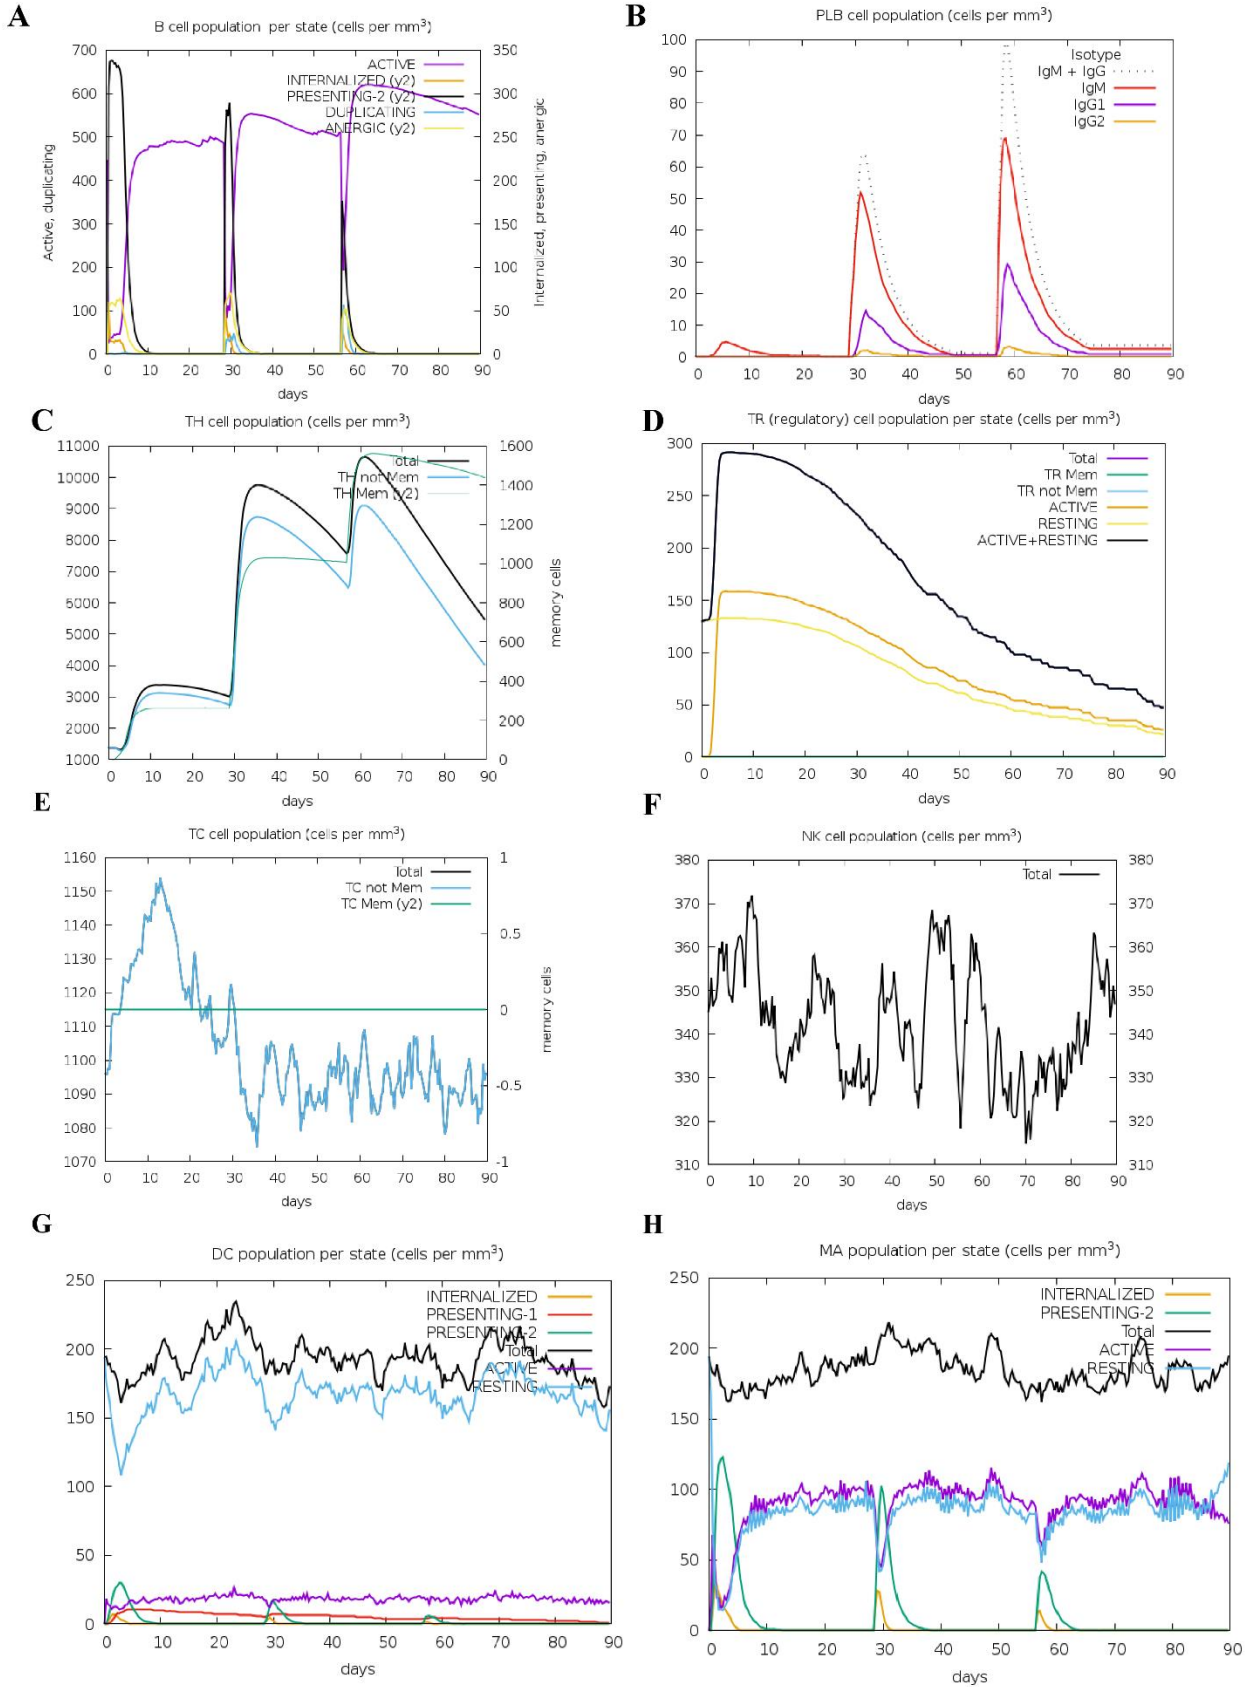

**Figure S1.** Immune simulation results. (A) B cell population per entity-state showing counts of active, presenting, duplicating cells, etc. (B) Plasma B lymphocytes count sub-divided per isotype (IgM, IgG1 and IgG2). (C) CD4 T-helper lymphocytes count. The plot shows total and memory counts. (D) Count of CD4 T-regulatory lymphocytes (total, memory, and per entity-state counts). (E) Count of CD8 T-cytotoxic lymphocytes. (F) Total count of Natural Killer cells. (G) Total count of active, resting, internalized, and antigen-presenting dendritic cells. (H) Total count of internalized, presenting on MHC class-II, active, and resting macrophages.

## Supplementary tables

**Table S1.** List of T cell epitopes (antigen A29L-A30L-A27L) containing conserved amino acid sequences (origin VACV)

| #  | Epitope          | Epitope ID | Length | Position | Publications/Assays                                               | Summary                                                                                                |
|----|------------------|------------|--------|----------|-------------------------------------------------------------------|--------------------------------------------------------------------------------------------------------|
| 1  | AKKPEAKREAIVKAD  | 2216       | 15     | 25-39    | Tested in 1 T Cell Assay                                          | IFN $\gamma$ release – 1/1                                                                             |
| 2  | ETLKQRLTNLEKKIT  | 14458      | 15     | 45-59    | Tested in 2 T Cell Assay                                          | IFN $\gamma$ release – 2/2                                                                             |
| 3  | EVLFRLENHAETLRA  | 14762      | 15     | 77-91    | Tested in 1 T Cell Assay                                          | IFN $\gamma$ release – 1/1                                                                             |
| 4  | KQRLTNLEK        | 33061      | 9      | 48-56    | 3 publications, tested in 5 T cell assays and 1 MHC ligand assay  | T cell assays: IFN $\gamma$ release – 1/5<br>MHC ligand assays: HLA-A*30:01 – 1/1                      |
| 5  | LRAAMISLAKKIDVQ  | 39027      | 15     | 89-103   | 3 publications, tested in 3 T cell assays and 1 MHC ligand assay  | T cell assays: Cytotoxicity – 2/2<br>IFN $\gamma$ release – 0/1<br>MHC ligand assays: H2-IAb – 1/1     |
| 6  | TLFPGDDDL        | 64800      | 9      | 4-12     | 4 publications, tested in 3 T cell assays and 1 MHC ligand assay  | T cell assays: IFN $\gamma$ release – 2/3<br>MHC ligand assays: HLA-A*02:01 – 1/1                      |
| 7  | TLKQRLTNL        | 64883      | 9      | 46-54    | 6 publications, tested in 3 T cell assays and 5 MHC ligand assays | T cell assays: IFN $\gamma$ release – 1/3<br>MHC ligand assays: HLA-A*02:01 – 4/4<br>HLA-B*08:01 – 1/1 |
| 8  | TLRAAMISL        | 65031      | 9      | 88-96    | 6 publications, tested in 3 T cell assays and 3 MHC ligand assays | T cell assays: IFN $\gamma$ release – 1/3<br>MHC ligand assays: HLA-A*02:01 – 2/2<br>HLA-A*30:01 – 1/1 |
| 9  | AAMISLAKK        | 80142      | 9      | 91-99    | Tested in 1 MHC ligand assay                                      | HLA-A*30:01 – 1/1                                                                                      |
| 10 | LAIPATEFF        | 84958      | 9      | 12-20    | Tested in 1 MHC ligand assay                                      | HLA-B*15:01 – 1/1                                                                                      |
| 11 | EVLFRLENHAETLRAA | 140023     | 16     | 77-92    | Tested in 1 T Cell Assay                                          | IFN $\gamma$ release – 1/1                                                                             |

|    |                  |         |    |       |                              |                            |
|----|------------------|---------|----|-------|------------------------------|----------------------------|
| 12 | KADEDDNEETLKQRLT | 140040  | 16 | 37-52 | Tested in 1 T Cell Assay     | IFN $\gamma$ release – 1/1 |
| 13 | KITNVTTKFEQIEKCC | 140046  | 16 | 57-72 | Tested in 1 T Cell Assay     | IFN $\gamma$ release – 1/1 |
| 14 | KRNDEVLF         | 1625401 | 9  | 73-81 | Tested in 1 MHC ligand assay | HLA-B*27:05 – 1/1          |

**Table S2.** List of B cell epitopes (antigen A29L-A30L-A27L)

| A29L-A30L-A27L (MPXV, VARV, and VACV) – Consensus sequence                                                                                                             | Predicted linear epitopes | Position |
|------------------------------------------------------------------------------------------------------------------------------------------------------------------------|---------------------------|----------|
| >Consensus/1-110 Percentage Identity Consensus<br>MDGTLFPGDDDLAIPATEFFSTKAAKKPEAKREAIVKADGDDNEE<br>TLKQRLTNLEKKITNVTTKFEQIEKCKRNDEVLFRLNHAETLR<br>AAMISLAKKIDVQTGRRPYE | DGDDN                     | 38-42    |
|                                                                                                                                                                        | VQTGR                     | 101-105  |

**Table S3.** List of T cell epitopes (antigen A30L/A31L/A28L) containing conserved amino acid sequences (origin VACV)

| # | Epitope               | Epitope ID | Length | Position | Publications/Assays                                               | Summary                                                                                                    |
|---|-----------------------|------------|--------|----------|-------------------------------------------------------------------|------------------------------------------------------------------------------------------------------------|
| 1 | ATAAVCLLFIQGYSIYENYGN | 4868       | 21     | 12-32    | Tested in 2 T cell assays and 1 MHC ligand assay                  | T cell assays:<br>IFN $\gamma$ release – 2/2<br>MHC Ligand Assays:<br>HLA-DRB1*01:01 – 1/1                 |
| 2 | FFIVVATAAVCLLFI       | 15833      | 15     | 7-21     | 3 publications, tested in 2 T cell assays and 3 MHC ligand assays | T cell assays:<br>IFN $\gamma$ release – 2/2<br>MHC ligand assays:<br>H2-IAb – 2/2<br>HLA-DRB1*04:01 – 1/1 |
| 3 | FIVVATAAV             | 16327      | 9      | 8-16     | 6 publications, tested in 6 T cell assays and 3 MHC ligand assays | T cell assays:<br>IFN $\gamma$ release – 2/6<br>MHC Ligand Assays:<br>HLA-A*02:01 – 3/3                    |
| 4 | MNSLSIFFIVVATAAVCLLFI | 42240      | 21     | 1-21     | Tested in 2 T cell assays and 1 MHC ligand assay                  | T cell assays:<br>IFN $\gamma$ release – 2/2<br>MHC ligand assays:<br>HLA-DRB1*01:01 – 1/1                 |

|   |                 |        |    |         |                                                                   |                                                                                                        |
|---|-----------------|--------|----|---------|-------------------------------------------------------------------|--------------------------------------------------------------------------------------------------------|
| 5 | RSIRKFNTM       | 55865  | 9  | 101-109 | 2 publications, tested in 2 T cell assays and 2 MHC ligand assays | T cell assays: IFN $\gamma$ release – 0/2<br>MHC ligand assays: HLA-B*08:01 – 1/1<br>HLA-B*15:01 – 1/1 |
| 6 | SIFGFQAEV       | 58497  | 9  | 87-95   | 4 publications, tested in 2 T cell assays and 2 MHC ligand assays | T cell assays: IFN $\gamma$ release – 0/2<br>MHC ligand assays: HLA-A*02:01 – 2/2                      |
| 7 | LSIFFIVVA       | 85829  | 9  | 4-12    | Tested in 1 MHC ligand assay                                      | HLA-B*15:01 – 1/1                                                                                      |
| 8 | NINNAECQF       | 86779  | 9  | 133-141 | Tested in 1 MHC ligand assay                                      | HLA-B*15:01 – 1/1                                                                                      |
| 9 | AVCLLFIQGYSIYEN | 190204 | 15 | 15-29   | Tested in 2 MHC ligand assays                                     | HLA-DRB1*01:01 – 2/2                                                                                   |

**Table S4.** List of B cell epitopes (antigen A30L/A31L/A28L)

| A30L-A31L-A28L (MPXV, VARV, and VACV) – Consensus sequence                                                                                                                                                     | Predicted linear epitopes | Position |
|----------------------------------------------------------------------------------------------------------------------------------------------------------------------------------------------------------------|---------------------------|----------|
| >Consensus/1-146 Percentage Identity Consensus<br>MNSLSIFFIVVATAAVCLLFIQSYSIYENYGNIKEFNATHAAFEY<br>SKSIGGTPALDRRVQDVNDTISDVKKWRCVVYPGNGFVSASI<br>FGFQAEVGPNNTRSIRKFNTMRQCIDFTFSDVINIDIYNPCAPNI<br>NNTECQFLKSVL | SKSIGGTPA                 | 45-53    |
|                                                                                                                                                                                                                | QDVNDTISD                 | 59-67    |
|                                                                                                                                                                                                                | GPNNTR                    | 95-100   |

**Table S5.** List of T cell epitopes (antigen A35R-A36R-A33R) containing conserved amino acid sequences (origin VACV)

| # | Epitope    | Epitope ID | Length | Position | Publications/ Assays                                             | Summary                                                                           |
|---|------------|------------|--------|----------|------------------------------------------------------------------|-----------------------------------------------------------------------------------|
| 1 | CMSANEAAI  | 6667       | 9      | 62-70    | 3 publications, tested in 1 T cell assay and 2 MHC ligand assays | T cell assays: IFN $\gamma$ release – 0/1<br>MHC ligand assays: HLA-A*02:01 – 2/2 |
| 2 | GLYYQGSCYI | 21244      | 10     | 102-111  | 3 publications, tested in 1 T cell assay and 2 MHC ligand assays | T cell assays: IFN $\gamma$ release – 0/1<br>MHC ligand assays: HLA-A*02:01 – 2/2 |

|    |                 |       |    |         |                                                                   |                                                                                                                 |
|----|-----------------|-------|----|---------|-------------------------------------------------------------------|-----------------------------------------------------------------------------------------------------------------|
| 3  | ITMSAFLIV       | 28998 | 9  | 49-57   | 6 publications, tested in 3 T cell assays and 4 MHC ligand assays | T cell assays:<br>IFN $\gamma$ release – 0/3<br>MHC ligand assays:<br>HLA-A*02:01 – 2/2<br>Mamu-A1*001:01 – 2/2 |
| 4  | LITWLIDYV       | 36737 | 9  | 140-148 | 4 publications, tested in 2 T cell assays and 2 MHC ligand assays | T cell assays:<br>IFN $\gamma$ release – 0/2<br>MHC ligand assays:<br>HLA-A*02:01 – 2/2                         |
| 5  | SMITMSAFL       | 59689 | 9  | 47-55   | 5 publications, tested in 6 T cell assays and 2 MHC ligand assays | T cell assays:<br>IFN $\gamma$ release – 0/6<br>MHC ligand assays:<br>HLA-A*02:01 – 2/2                         |
| 6  | SMVISLLSM       | 59769 | 9  | 40-48   | 3 publications, tested in 1 T cell assay and 3 MHC ligand assays  | T cell assays:<br>IFN $\gamma$ release – 0/1<br>MHC ligand assays:<br>HLA-A*02:01 – 0/2<br>HLA-B*15:03 – 1/1    |
| 7  | TKTTSDYQSDVSQ   | 64687 | 14 | 160-173 | Tested in 1 T cell assay                                          | IFN $\gamma$ release – 1/1                                                                                      |
| 8  | VLITWLIDYV      | 69551 | 10 | 139-148 | 4 publications, tested in 2 T cell assays and 2 MHC ligand assays | T cell assays:<br>IFN $\gamma$ release – 0/2<br>MHC ligand assays:<br>HLA-A*02:01 – 2/2                         |
| 9  | AASSTHRKV       | 80156 | 9  | 79-87   | 2 publications, tested in 2 MHC ligand assays                     | HLA-A*02:01 – 2/2                                                                                               |
| 10 | AITDAAVAV       | 80297 | 9  | 69-77   | 2 publications, tested in 2 MHC ligand assays                     | HLA-A*02:01 – 2/2                                                                                               |
| 11 | AITDAAVAVA      | 80298 | 10 | 69-78   | 2 publications, tested in 2 MHC ligand assays                     | HLA-A*02:01 – 2/2                                                                                               |
| 12 | DKIQGKNKRKRVIQL | 81087 | 15 | 21-35   | 2 publications, tested in 1 T                                     | T cell assays:<br>IFN $\gamma$ release – 0/1<br>MHC ligand assays:                                              |

|    |                 |       |    |             |                                                                                  |                                                                                                                                                                                                                                                                                                    |
|----|-----------------|-------|----|-------------|----------------------------------------------------------------------------------|----------------------------------------------------------------------------------------------------------------------------------------------------------------------------------------------------------------------------------------------------------------------------------------------------|
|    |                 |       |    |             | cell assay<br>and 12 MHC<br>ligand assays                                        | HLA-DR13 – 1/1<br>HLA-DPB1*04:01 – 0/1<br>HLA-DPB1*04:02 – 0/1<br>HLA-DR1 – 0/1<br>HLA-DR11 – 0/1<br>HLA-DR15 – 0/1<br>HLA-DR3 – 0/1<br>HLA-DR4 – 0/1<br>HLA-DR7 – 0/1<br>HLA-DRB3 – 0/1<br>HLA-DRB4 – 0/1<br>HLA-DRB5 – 0/1                                                                       |
| 13 | EAAITDAAV       | 81375 | 9  | 67-75       | 2<br>publications,<br>tested in 2<br>MHC ligand<br>assays                        | HLA-A*02:01 – 2/2                                                                                                                                                                                                                                                                                  |
| 14 | FLIVRLNQCM      | 82205 | 10 | 54-63       | 2<br>publications,<br>tested in 2<br>MHC ligand<br>assays                        | HLA-A*02:01 – 2/2                                                                                                                                                                                                                                                                                  |
| 15 | GLCIRISMV       | 82727 | 9  | 34-42       | 2<br>publications,<br>tested in 2<br>MHC ligand<br>assays                        | HLA-A*02:01 – 2/2                                                                                                                                                                                                                                                                                  |
| 16 | GLCIRISMVI      | 82728 | 10 | 34-43       | 2<br>publications,<br>tested in 2<br>MHC ligand<br>assays                        | HLA-A*02:01 – 2/2                                                                                                                                                                                                                                                                                  |
| 17 | ITWLIDYVEDTWGSD | 84055 | 15 | 141-<br>155 | 2<br>publications,<br>tested in 1 T<br>cell assay<br>and 12 MHC<br>ligand assays | T cell assays:<br>IFN $\gamma$ release – 0/1<br>MHC ligand assays:<br>HLA-DR15 – 1/1<br>HLA-DR3 – 1/1<br>HLA-DR4 – 1/1<br>HLA-DPB1*04:01 – 0/1<br>HLA-DPB1*04:02 – 0/1<br>HLA-DR1 – 0/1<br>HLA-DR11 – 0/1<br>HLA-DR13 – 0/1<br>HLA-DR7 – 0/1<br>HLA-DRB3 – 0/1<br>HLA-DRB4 – 0/1<br>HLA-DRB5 – 0/1 |
| 18 | LLSMITMSA       | 85522 | 9  | 45-53       | 2<br>publications,<br>tested in 2                                                | HLA-A*02:01 – 2/2                                                                                                                                                                                                                                                                                  |



|    |                 |       |    |         |                                                                     |                                                                                                                                                                                                                                                                                                      |
|----|-----------------|-------|----|---------|---------------------------------------------------------------------|------------------------------------------------------------------------------------------------------------------------------------------------------------------------------------------------------------------------------------------------------------------------------------------------------|
|    |                 |       |    |         | MHC ligand assays                                                   |                                                                                                                                                                                                                                                                                                      |
| 19 | LSMITMSAFLIVRLN | 85862 | 15 | 46-60   | 2 publications, tested in 21 T cell assays and 12 MHC ligand assays | T cell assays:<br>IFN $\gamma$ release – 20/21<br>MHC ligand assays:<br>HLA-DPB1*04:01 – 1/1<br>HLA-DPB1*04:02 – 1/1<br>HLA-DR1 – 1/1<br>HLA-DR11 – 1/1<br>HLA-DR13 – 1/1<br>HLA-DR15 – 1/1<br>HLA-DR3 – 1/1<br>HLA-DR7 – 1/1<br>HLA-DRB3 – 1/1<br>HLA-DRB4 – 1/1<br>HLA-DRB5 – 1/1<br>HLA-DR4 – 0/1 |
| 20 | MITMSAFLI       | 86308 | 9  | 48-56   | 3 publications, tested in 3 MHC ligand assays                       | HLA-A*02:01 – 2/2<br>Mamu-B*017:04 – 1/1                                                                                                                                                                                                                                                             |
| 21 | MITMSAFLIV      | 86309 | 10 | 48-57   | 2 publications, tested in 2 MHC ligand assays                       | HLA-A*02:01 – 2/2                                                                                                                                                                                                                                                                                    |
| 22 | MVISLLSMI       | 86598 | 9  | 41-49   | 2 publications, tested in 2 MHC ligand assays                       | HLA-A*02:01 – 2/2                                                                                                                                                                                                                                                                                    |
| 23 | NGLYYQGSCYILHSD | 86731 | 15 | 101-115 | 2 publications, tested in 5 T cell assays and 12 MHC ligand assays  | T cell assays:<br>IFN $\gamma$ release – 4/5<br>MHC ligand assays:<br>HLA-DR1 – 1/1<br>HLA-DR13 – 1/1<br>HLA-DR15 – 1/1<br>HLA-DR3 – 1/1<br>HLA-DPB1*04:01 – 0/1<br>HLA-DPB1*04:02 – 0/1<br>HLA-DR11 – 0/1<br>HLA-DR4 – 0/1<br>HLA-DR7 – 0/1<br>HLA-DRB3 – 0/1<br>HLA-DRB4 – 0/1<br>HLA-DRB5 – 0/1   |
| 24 | QTSVFSATV       | 87736 | 9  | 10-18   | 2 publications, tested in 2                                         | HLA-A*02:01 – 2/2                                                                                                                                                                                                                                                                                    |

|    |                 |       |    |         |                                                                    |                                                                                                                                                                                                                                                                                                    |
|----|-----------------|-------|----|---------|--------------------------------------------------------------------|----------------------------------------------------------------------------------------------------------------------------------------------------------------------------------------------------------------------------------------------------------------------------------------------------|
|    |                 |       |    |         | MHC ligand assays                                                  |                                                                                                                                                                                                                                                                                                    |
| 25 | RISMVISLL       | 87942 | 9  | 38-46   | 2 publications, tested in 2 MHC ligand assays                      | HLA-A*02:01 – 2/2                                                                                                                                                                                                                                                                                  |
| 26 | RVIGLCIRI       | 88293 | 9  | 31-39   | 2 publications, tested in 2 MHC ligand assays                      | HLA-A*02:01 – 2/2                                                                                                                                                                                                                                                                                  |
| 27 | RVIGLCIRISMVISL | 88294 | 15 | 31-45   | 2 publications, tested in 7 T cell assays and 12 MHC ligand assays | T cell assays:<br>IFN $\gamma$ release – 6/7<br>MHC ligand assays:<br>HLA-DPB1*04:01 – 1/1<br>HLA-DPB1*04:02 – 1/1<br>HLA-DR1 – 1/1<br>HLA-DR15 – 1/1<br>HLA-DR3 – 1/1<br>HLA-DR4 – 1/1<br>HLA-DR7 – 1/1<br>HLA-DRB4 – 1/1<br>HLA-DR11 – 0/1<br>HLA-DR13 – 0/1<br>HLA-DRB3 – 0/1<br>HLA-DRB5 – 0/1 |
| 28 | SLLSMITMSA      | 88825 | 10 | 44-53   | 2 publications, tested in 2 MHC ligand assays                      | HLA-A*02:01 – 2/2                                                                                                                                                                                                                                                                                  |
| 29 | SMITMSAFLI      | 88893 | 10 | 47-56   | 2 publications, tested in 2 MHC ligand assays                      | HLA-A*02:01 – 2/2                                                                                                                                                                                                                                                                                  |
| 30 | SMVISLLSMI      | 88912 | 10 | 40-49   | 2 publications, tested in 2 MHC ligand assays                      | HLA-A*02:01 – 2/2                                                                                                                                                                                                                                                                                  |
| 31 | SQEVRYKYFCV     | 88990 | 10 | 172-181 | 2 publications, tested in 2 MHC ligand assays                      | HLA-A*02:01 – 2/2                                                                                                                                                                                                                                                                                  |
| 32 | TMSAFLIVRL      | 89603 | 10 | 50-59   | 2 publications, tested in 2                                        | HLA-A*02:01 – 2/2                                                                                                                                                                                                                                                                                  |

|    |                 |        |    |         |                                               |                                                                                                                                                                                                                              |
|----|-----------------|--------|----|---------|-----------------------------------------------|------------------------------------------------------------------------------------------------------------------------------------------------------------------------------------------------------------------------------|
|    |                 |        |    |         | MHC ligand assays                             |                                                                                                                                                                                                                              |
| 33 | VIGLCIRISM      | 90020  | 10 | 32-41   | 2 publications, tested in 2 MHC ligand assays | HLA-A*02:01 – 2/2                                                                                                                                                                                                            |
| 34 | VISLLSMIT       | 90054  | 9  | 42-50   | 2 publications, tested in 2 MHC ligand assays | HLA-A*02:01 – 1/2                                                                                                                                                                                                            |
| 35 | WLIDYVEDT       | 90588  | 9  | 143-151 | 2 publications, tested in 2 MHC ligand assays | HLA-A*02:01 – 2/2                                                                                                                                                                                                            |
| 36 | YQLFSDAKA       | 90919  | 9  | 116-124 | 2 publications, tested in 2 MHC ligand assays | HLA-A*02:01 – 2/2                                                                                                                                                                                                            |
| 37 | AAITDAAVAVAAASS | 103005 | 15 | 68-82   | Tested in 12 MHC ligand assays                | HLA-DR1 – 1/1<br>HLA-DPB1*04:01 – 0/1<br>HLA-DPB1*04:02 – 0/1<br>HLA-DR11 – 0/1<br>HLA-DR13 – 0/1<br>HLA-DR15 – 0/1<br>HLA-DR3 – 0/1<br>HLA-DR4 – 0/1<br>HLA-DR7 – 0/1<br>HLA-DRB3 – 0/1<br>HLA-DRB4 – 0/1<br>HLA-DRB5 – 0/1 |
| 38 | AAVAVAAASSTHRKV | 103009 | 15 | 73-87   | Tested in 12 MHC ligand assays                | HLA-DRB5 – 1/1<br>HLA-DPB1*04:01 – 0/1<br>HLA-DPB1*04:02 – 0/1<br>HLA-DR1 – 0/1<br>HLA-DR11 – 0/1<br>HLA-DR13 – 0/1<br>HLA-DR15 – 0/1<br>HLA-DR3 – 0/1<br>HLA-DR4 – 0/1<br>HLA-DR7 – 0/1<br>HLA-DRB3 – 0/1<br>HLA-DRB4 – 0/1 |
| 39 | LIVRLNQCMSANEAA | 103360 | 15 | 55-69   | Tested in 12 MHC ligand assays                | HLA-DR1 – 1/1<br>HLA-DPB1*04:01 – 0/1<br>HLA-DPB1*04:02 – 0/1<br>HLA-DR11 – 0/1                                                                                                                                              |

|    |                 |        |    |         |                                                    |                                                                                                                                                                                                                                                                                                    |
|----|-----------------|--------|----|---------|----------------------------------------------------|----------------------------------------------------------------------------------------------------------------------------------------------------------------------------------------------------------------------------------------------------------------------------------------------------|
|    |                 |        |    |         |                                                    | HLA-DR13 – 0/1<br>HLA-DR15 – 0/1<br>HLA-DR3 – 0/1<br>HLA-DR4 – 0/1<br>HLA-DR7 – 0/1<br>HLA-DRB3 – 0/1<br>HLA-DRB4 – 0/1<br>HLA-DRB5 – 0/1                                                                                                                                                          |
| 40 | SAFLIVRLNQCMSAN | 103581 | 15 | 52-66   | Tested in 7 T cell assays and 12 MHC ligand assays | T cell assays:<br>IFN $\gamma$ release – 7/7<br>MHC ligand assays:<br>HLA-DR1 – 1/1<br>HLA-DR11 – 1/1<br>HLA-DR13 – 1/1<br>HLA-DR15 – 1/1<br>HLA-DR3 – 1/1<br>HLA-DR4 – 1/1<br>HLA-DR7 – 1/1<br>HLA-DPB1*04:01 – 0/1<br>HLA-DPB1*04:02 – 0/1<br>HLA-DRB3 – 0/1<br>HLA-DRB4 – 0/1<br>HLA-DRB5 – 0/1 |
| 41 | SCYILHSDYQLFSDA | 103582 | 15 | 108-122 | Tested in 12 MHC ligand assays                     | HLA-DR15 – 1/1<br>HLA-DR3 – 1/1<br>HLA-DRB3 – 1/1<br>HLA-DPB1*04:01 – 0/1<br>HLA-DPB1*04:02 – 0/1<br>HLA-DR1 – 0/1<br>HLA-DR11 – 0/1<br>HLA-DR13 – 0/1<br>HLA-DR4 – 0/1<br>HLA-DR7 – 0/1<br>HLA-DRB4 – 0/1<br>HLA-DRB5 – 0/1                                                                       |
| 42 | SDYQLFSDAKANCTA | 103588 | 15 | 114-128 | Tested in 2 T cell assays and 12 MHC ligand assays | T cell assays:<br>IFN $\gamma$ release – 2/2<br>MHC ligand assays:<br>HLA-DR3 – 1/1<br>HLA-DR4 – 1/1<br>HLA-DPB1*04:01 – 0/1<br>HLA-DPB1*04:02 – 0/1<br>HLA-DR1 – 0/1<br>HLA-DR11 – 0/1<br>HLA-DR13 – 0/1<br>HLA-DR15 – 0/1<br>HLA-DR7 – 0/1<br>HLA-DRB3 – 0/1<br>HLA-DRB4 – 0/1<br>HLA-DRB5 – 0/1 |

|    |                  |        |    |         |                                               |                            |
|----|------------------|--------|----|---------|-----------------------------------------------|----------------------------|
| 43 | AFLIVRLNQCMSANEA | 139996 | 16 | 53-68   | Tested in 1 T cell assay                      | IFN $\gamma$ release – 1/1 |
| 44 | CYILHSDYQLFSDAKA | 140011 | 16 | 109-124 | Tested in 1 T cell assay                      | IFN $\gamma$ release – 1/1 |
| 45 | DKIQGKNKRKRVIGLC | 140012 | 16 | 21-36   | Tested in 1 T cell assay                      | IFN $\gamma$ release – 1/1 |
| 46 | EQTSVFSATVYGDKIQ | 140022 | 16 | 9-24    | Tested in 1 T cell assay                      | IFN $\gamma$ release – 1/1 |
| 47 | IRISMVISLLSMITMS | 140037 | 16 | 37-52   | Tested in 1 T cell assay                      | IFN $\gamma$ release – 1/1 |
| 48 | SSTTQYDHKESCNGLY | 140072 | 16 | 89-104  | Tested in 1 T cell assay                      | IFN $\gamma$ release – 1/1 |
| 49 | TVYGDQIQGKNKRKRV | 140074 | 16 | 17-32   | Tested in 1 T cell assay                      | IFN $\gamma$ release – 1/1 |
| 50 | EEQTSVFSA        | 189060 | 9  | 8-16    | 2 publications, tested in 2 MHC ligand assays | HLA-B*45:01 – 2/2          |
| 51 | NEAAITDAAV       | 496800 | 10 | 66-75   | Tested in 1 MHC ligand assay                  | HLA-B*45:01 – 1/1          |
| 52 | ILHSDYQLF        | 83662  | 9  | 111-119 | Tested in 1 MHC ligand assay                  | HLA-B*15:03 – 1/1          |
| 53 | YILHSDYQL        | 90780  | 9  | 110-118 | 2 publications, tested in 2 MHC ligand assays | HLA-A*02:01 – 2/2          |
| 54 | KANCTAESST       | 84178  | 10 | 123-132 | 2 publications, tested in 2 MHC ligand assays | HLA-A*02:01 – 2/2          |
| 55 | DTWGSDGNPI       | 81309  | 10 | 150-159 | 2 publications, tested in 2 MHC ligand assays | HLA-A*02:01 – 2/2          |

**Table S6.** List of B cell epitopes (antigen A35R-A36R-A33R)

| A35R-A36R-A33R (MPXV, VARV, and VACV) – Consensus sequence                                                                                                                                 | Predicted linear epitopes | Position |
|--------------------------------------------------------------------------------------------------------------------------------------------------------------------------------------------|---------------------------|----------|
| >Consensus/1-185 Percentage Identity Consensus<br>MMPENDEEQTSVFSATVYGDQIQGKNKRKRVIGLCIRISMVIS<br>LLSMITMSAFLIVRLNQCMSANEAITDAAVAVAAASSTHRKV<br>ASSTTQYDHKESCNGLYYQGSCYILHSDYQLFSDAKANCAAES | EEQTS                     | 7-11     |
|                                                                                                                                                                                            | STHRKVASS<br>TTQYDHK      | 81-96    |

|                                                            |                        |         |
|------------------------------------------------------------|------------------------|---------|
| STLPNKSDVLTWTLIDYVEDTWGSDGNPITKTTSDYQSDVSQ<br>EVRKYFCVKTMN | PITKTTSDYQ<br>DSDVSQEV | 157-174 |
|------------------------------------------------------------|------------------------|---------|

**Table S7.** List of T cell epitopes (antigen B6R-B7R-B5R) containing conserved amino acid sequences (origin VACV and VARV)

| # | Epitope         | Epitope ID | Length | Position | Source   | Publications/Assays                                               | Summary                                                                                                                                                                                                                                                                                      |
|---|-----------------|------------|--------|----------|----------|-------------------------------------------------------------------|----------------------------------------------------------------------------------------------------------------------------------------------------------------------------------------------------------------------------------------------------------------------------------------------|
| 1 | CIDGKWNPIPTCVR  | 6410       | 15     | 225-239  | Vaccinia | Tested in 2 T cell assays                                         | Cytotoxicity – 2/2                                                                                                                                                                                                                                                                           |
| 2 | FLISVIVLV       | 16674      | 9      | 292-300  | Vaccinia | 5 publications, tested in 2 T cell assays and 4 MHC ligand assays | T cell assays: IFN $\gamma$ release – 0/2<br>MHC ligand assays: HLA-A*02:01 – 4/4                                                                                                                                                                                                            |
| 3 | IIVALTIMGV      | 26716      | 10     | 281-290  | Vaccinia | 4 publications, tested in 2 T cell assays and 2 MHC ligand assays | T cell assays: IFN $\gamma$ release – 0/2<br>MHC ligand assays: HLA-A*02:01 – 2/2                                                                                                                                                                                                            |
| 4 | IMGVIFLISV      | 27497      | 10     | 287-296  | Vaccinia | 5 publications, tested in 2 T cell assays and 4 MHC ligand assays | T cell assays: IFN $\gamma$ release – 0/2<br>MHC ligand assays: HLA-A*02:01 – 4/4                                                                                                                                                                                                            |
| 5 | KMCTVSDYI       | 32294      | 9      | 74-82    | Vaccinia | 4 publications, tested in 4 T cell assays and 2 MHC ligand assays | T cell assays: IFN $\gamma$ release – 0/4<br>MHC ligand assays: HLA-A*02:01 – 2/2                                                                                                                                                                                                            |
| 6 | LTIMGVIFLI      | 39968      | 10     | 285-294  | Vaccinia | 4 publications, tested in 2 T cell assays and 2 MHC ligand assays | T cell assays: IFN $\gamma$ release – 0/2<br>MHC ligand assays: HLA-A*02:01 – 2/2                                                                                                                                                                                                            |
| 7 | NGLISGSTFSIGGVI | 44027      | 15     | 193-207  | Vaccinia | 2 publications, tested in 1 T cell assay and 12 MHC ligand assays | T cell assays: IFN $\gamma$ release – 1/1<br>MHC ligand assays: HLA-DR4 – 1/1<br>HLA-DR7 – 1/1<br>HLA-DPB1*04:01 – 0/1<br>HLA-DPB1*04:02 – 0/1<br>HLA-DR1 – 0/1<br>HLA-DR11 – 0/1<br>HLA-DR13 – 0/1<br>HLA-DR15 – 0/1<br>HLA-DR3 – 0/1<br>HLA-DRB3 – 0/1<br>HLA-DRB4 – 0/1<br>HLA-DRB5 – 0/1 |
| 8 | SVVTLLCVLPVVYS  | 62392      | 15     | 5-19     | Vaccinia | 2 publications, tested in 2 T cell assays                         | Cytotoxicity – 1/1<br>IFN $\gamma$ release – 0/1                                                                                                                                                                                                                                             |
| 9 | TIMGVIFLI       | 64382      | 9      | 286-294  | Vaccinia | 4 publications, tested in 2 T cell                                | T cell assays: IFN $\gamma$ release – 0/2                                                                                                                                                                                                                                                    |

|    |                 |       |    |         |          |                                                                    |                                                                                                                                                                                                                                                                                                    |
|----|-----------------|-------|----|---------|----------|--------------------------------------------------------------------|----------------------------------------------------------------------------------------------------------------------------------------------------------------------------------------------------------------------------------------------------------------------------------------------------|
|    |                 |       |    |         |          | assays and 2 MHC ligand assays                                     | MHC ligand assays:<br>HLA-A*02:01 – 2/2                                                                                                                                                                                                                                                            |
| 10 | TKYFRCEEKNGNTSW | 64699 | 15 | 105-119 | Vaccinia | 2 publications, tested in 1 T cell assay and 12 MHC ligand assays  | T cell assays:<br>Cytotoxicity – 1/1<br>MHC ligand assays:<br>HLA-DR11 – 1/1<br>HLA-DPB1*04:01 – 0/1<br>HLA-DPB1*04:02 – 0/1<br>HLA-DR1 – 0/1<br>HLA-DR13 – 0/1<br>HLA-DR15 – 0/1<br>HLA-DR3 – 0/1<br>HLA-DR4 – 0/1<br>HLA-DR7 – 0/1<br>HLA-DRB3 – 0/1<br>HLA-DRB4 – 0/1<br>HLA-DRB5 – 0/1         |
| 11 | TLLCVLPAV       | 64896 | 9  | 8-16    | Vaccinia | 4 publications, tested in 2 T cell assays and 2 MHC ligand assays  | T cell assays:<br>IFN $\gamma$ release – 0/2<br>MHC ligand assays:<br>HLA-A*02:01 – 2/2                                                                                                                                                                                                            |
| 12 | TLLCVLPAVV      | 64897 | 10 | 8-17    | Vaccinia | 5 publications, tested in 2 T cell assays and 4 MHC ligand assays  | T cell assays:<br>IFN $\gamma$ release – 0/2<br>MHC ligand assays:<br>HLA-A*02:01 – 4/4                                                                                                                                                                                                            |
| 13 | VLPVVYST        | 69678 | 9  | 12-20   | Vaccinia | 4 publications, tested in 2 T cell assays and 2 MHC ligand assays  | T cell assays:<br>IFN $\gamma$ release – 0/2<br>MHC ligand assays:<br>HLA-A*02:01 – 2/2                                                                                                                                                                                                            |
| 14 | ALTIMGVIFL      | 80386 | 10 | 284-293 | Vaccinia | 2 publications, tested in 2 MHC ligand assays                      | HLA-A*02:01 – 2/2                                                                                                                                                                                                                                                                                  |
| 15 | ASYISCTANSWNVIP | 80503 | 15 | 166-180 | Vaccinia | 2 publications, tested in 8 T cell assays and 12 MHC ligand assays | T cell assays:<br>IFN $\gamma$ release – 7/8<br>MHC ligand assays:<br>HLA-DPB1*04:01 – 1/1<br>HLA-DPB1*04:02 – 1/1<br>HLA-DR1 – 1/1<br>HLA-DR13 – 1/1<br>HLA-DR15 – 1/1<br>HLA-DR4 – 1/1<br>HLA-DR7 – 1/1<br>HLA-DRB3 – 1/1<br>HLA-DRB5 – 1/1<br>HLA-DR11 – 0/1<br>HLA-DR3 – 0/1<br>HLA-DRB4 – 0/1 |
| 16 | ATYHIIIVAL      | 80541 | 10 | 276-285 | Vaccinia | 2 publications, tested in 2 MHC ligand assays                      | HLA-A*02:01 – 2/2                                                                                                                                                                                                                                                                                  |

|    |                |       |    |         |          |                                                                   |                                                                                                                                                                                                                                                                                                    |
|----|----------------|-------|----|---------|----------|-------------------------------------------------------------------|----------------------------------------------------------------------------------------------------------------------------------------------------------------------------------------------------------------------------------------------------------------------------------------------------|
| 17 | AVVYSTCTV      | 80587 | 9  | 15-23   | Vaccinia | 2 publications, tested in 2 MHC ligand assays                     | HLA-A*02:01 – 2/2                                                                                                                                                                                                                                                                                  |
| 18 | CIDGKWNPV      | 80683 | 9  | 225-233 | Vaccinia | 2 publications, tested in 2 MHC ligand assays                     | HLA-A*02:01 – 2/2                                                                                                                                                                                                                                                                                  |
| 19 | CIDGKWNPVL     | 80684 | 10 | 225-234 | Vaccinia | 2 publications, tested in 2 MHC ligand assays                     | HLA-A*02:01 – 2/2                                                                                                                                                                                                                                                                                  |
| 20 | CQQKCDMPSL     | 80785 | 10 | 182-191 | Vaccinia | 2 publications, tested in 2 MHC ligand assays                     | HLA-A*02:01 – 2/2                                                                                                                                                                                                                                                                                  |
| 21 | CTANSWNVI      | 80821 | 9  | 171-179 | Vaccinia | 2 publications, tested in 2 MHC ligand assays                     | HLA-A*02:01 – 2/2                                                                                                                                                                                                                                                                                  |
| 22 | CTVSDYISEL     | 80842 | 10 | 76-85   | Vaccinia | 2 publications, tested in 2 MHC ligand assays                     | HLA-A*02:01 – 2/2                                                                                                                                                                                                                                                                                  |
| 23 | CVLPAVVYST     | 80852 | 10 | 11-20   | Vaccinia | 2 publications, tested in 2 MHC ligand assays                     | HLA-A*02:01 – 2/2                                                                                                                                                                                                                                                                                  |
| 24 | DTVTCPNACQPLQL | 81308 | 15 | 121-135 | Vaccinia | 2 publications, tested in 1 T cell assay and 12 MHC ligand assays | T cell assays:<br>IFN $\gamma$ release – 0/1<br>MHC ligand assays:<br>HLA-DRB4 – 1/1<br>HLA-DPB1*04:01 – 0/1<br>HLA-DPB1*04:02 – 0/1<br>HLA-DR1 – 0/1<br>HLA-DR11 – 0/1<br>HLA-DR13 – 0/1<br>HLA-DR15 – 0/1<br>HLA-DR3 – 0/1<br>HLA-DR4 – 0/1<br>HLA-DR7 – 0/1<br>HLA-DRB3 – 0/1<br>HLA-DRB5 – 0/1 |
| 25 | EATYHIIIVA     | 81396 | 10 | 275-284 | Vaccinia | 2 publications, tested in 2 MHC ligand assays                     | HLA-A*02:01 – 2/2                                                                                                                                                                                                                                                                                  |
| 26 | ELYNKPLYEV     | 81691 | 10 | 84-93   | Vaccinia | 2 publications, tested in 2 MHC ligand assays                     | HLA-A*02:01 – 2/2                                                                                                                                                                                                                                                                                  |
| 27 | FTLTGSPSST     | 82427 | 10 | 215-224 | Vaccinia | 2 publications, tested in 2 MHC ligand assays                     | HLA-A*02:01 – 2/2                                                                                                                                                                                                                                                                                  |
| 28 | GLISGSTFSI     | 82745 | 10 | 194-203 | Vaccinia | 2 publications, tested in 2 MHC ligand assays                     | HLA-A*02:01 – 2/2                                                                                                                                                                                                                                                                                  |



|    |                 |       |    |         |          |                                                                     |                                                                                                                                                                                                                                                                                                     |
|----|-----------------|-------|----|---------|----------|---------------------------------------------------------------------|-----------------------------------------------------------------------------------------------------------------------------------------------------------------------------------------------------------------------------------------------------------------------------------------------------|
| 29 | HHIIVALTI       | 83074 | 9  | 279-287 | Vaccinia | 2 publications, tested in 3 MHC ligand assays                       | HLA-A*02:01 – 0/2<br>HLA-A*32:01 – 1/1                                                                                                                                                                                                                                                              |
| 30 | HHIIVALTIM      | 83075 | 10 | 279-288 | Vaccinia | 2 publications, tested in 2 MHC ligand assays                       | HLA-A*02:01 – 2/2                                                                                                                                                                                                                                                                                   |
| 31 | HLCKSGFTL       | 83138 | 10 | 208-217 | Vaccinia | 2 publications, tested in 2 MHC ligand assays                       | HLA-A*02:01 – 2/2                                                                                                                                                                                                                                                                                   |
| 32 | IVALTIMGV       | 84060 | 9  | 282-290 | Vaccinia | 2 publications, tested in 2 MHC ligand assays                       | HLA-A*02:01 – 2/2                                                                                                                                                                                                                                                                                   |
| 33 | KLTSTETSF       | 84538 | 9  | 30-38   | Vaccinia | Tested in 1 MHC ligand assays                                       | HLA-B*15:03 – 1/1                                                                                                                                                                                                                                                                                   |
| 34 | KTISVVTLL       | 84786 | 9  | 2-10    | Vaccinia | 2 publications, tested in 2 MHC ligand assays                       | HLA-A*02:01 – 2/2                                                                                                                                                                                                                                                                                   |
| 35 | KWKYENPCK       | 84906 | 9  | 65-73   | Vaccinia | Tested in 5 MHC ligand assays                                       | HLA-A*30:01 – 1/1<br>HLA-B*15:03 – 1/1<br>HLA-A*32:01 – 0/1<br>HLA-B*08:01 – 0/1<br>HLA-B*15:01 – 0/1                                                                                                                                                                                               |
| 36 | LISGSTFSI       | 85336 | 9  | 195-203 | Vaccinia | 2 publications, tested in 2 MHC ligand assays                       | HLA-A*02:01 – 2/2                                                                                                                                                                                                                                                                                   |
| 37 | LLCVLPAVV       | 85430 | 9  | 9-17    | Vaccinia | 2 publications, tested in 2 MHC ligand assays                       | HLA-A*02:01 – 2/2                                                                                                                                                                                                                                                                                   |
| 38 | LTIMGVIFL       | 85966 | 9  | 285-293 | Vaccinia | 2 publications, tested in 2 MHC ligand assays                       | HLA-A*02:01 – 2/2                                                                                                                                                                                                                                                                                   |
| 39 | MKTISVVTLLCVLPA | 86334 | 15 | 1-15    | Vaccinia | 2 publications, tested in 10 T cell assays and 12 MHC ligand assays | T cell assays:<br>IFN $\gamma$ release – 9/10<br>MHC ligand assays:<br>HLA-DPB1*04:01 – 1/1<br>HLA-DPB1*04:02 – 1/1<br>HLA-DR1 – 1/1<br>HLA-DR11 – 1/1<br>HLA-DR13 – 1/1<br>HLA-DR15 – 1/1<br>HLA-DR3 – 1/1<br>HLA-DR4 – 1/1<br>HLA-DR7 – 1/1<br>HLA-DRB3 – 1/1<br>HLA-DRB4 – 1/1<br>HLA-DRB5 – 0/1 |
| 40 | MTLSCNGET       | 86565 | 9  | 97-105  | Vaccinia | 2 publications, tested in 2 MHC ligand assays                       | HLA-A*02:01 – 2/2                                                                                                                                                                                                                                                                                   |

|    |                  |       |    |         |          |                                                                   |                                                                                                                                                                                                                                                                                                    |
|----|------------------|-------|----|---------|----------|-------------------------------------------------------------------|----------------------------------------------------------------------------------------------------------------------------------------------------------------------------------------------------------------------------------------------------------------------------------------------------|
| 41 | NTSWNDTVT        | 87107 | 9  | 116-124 | Vaccinia | 2 publications, tested in 2 MHC ligand assays                     | HLA-A*02:01 – 2/2                                                                                                                                                                                                                                                                                  |
| 42 | PAVVYSTCTV       | 87199 | 10 | 14-23   | Vaccinia | 2 publications, tested in 2 MHC ligand assays                     | HLA-A*02:01 – 2/2                                                                                                                                                                                                                                                                                  |
| 43 | PLYEVNSTM        | 87345 | 9  | 89-97   | Vaccinia | 2 publications, tested in 2 MHC ligand assays                     | HLA-A*02:01 – 2/2                                                                                                                                                                                                                                                                                  |
| 44 | PLYEVNSTMT       | 87346 | 10 | 89-98   | Vaccinia | 2 publications, tested in 2 MHC ligand assays                     | HLA-A*02:01 – 2/2                                                                                                                                                                                                                                                                                  |
| 45 | QLEHGSCQPV       | 87612 | 10 | 134-143 | Vaccinia | 2 publications, tested in 2 MHC ligand assays                     | HLA-A*02:01 – 2/2                                                                                                                                                                                                                                                                                  |
| 46 | QPLQLEHGSCQPVKE  | 87655 | 15 | 131-145 | Vaccinia | 2 publications, tested in 1 T cell assay and 12 MHC ligand assays | T cell assays:<br>IFN $\gamma$ release – 0/1<br>MHC ligand assays:<br>HLA-DR1 – 1/1<br>HLA-DPB1*04:01 – 0/1<br>HLA-DPB1*04:02 – 0/1<br>HLA-DR11 – 0/1<br>HLA-DR13 – 0/1<br>HLA-DR15 – 0/1<br>HLA-DR3 – 0/1<br>HLA-DR4 – 0/1<br>HLA-DR7 – 0/1<br>HLA-DRB3 – 0/1<br>HLA-DRB4 – 0/1<br>HLA-DRB5 – 0/1 |
| 47 | QPVKEKYSFGGEYMTI | 87661 | 15 | 141-155 | Vaccinia | 2 publications, tested in 1 T cell assay and 12 MHC ligand assays | T cell assays:<br>IFN $\gamma$ release – 0/1<br>MHC ligand assays:<br>HLA-DPB1*04:01 – 1/1<br>HLA-DPB1*04:02 – 1/1<br>HLA-DR13 – 1/1<br>HLA-DR15 – 1/1<br>HLA-DR3 – 1/1<br>HLA-DR1 – 0/1<br>HLA-DR11 – 0/1<br>HLA-DR4 – 0/1<br>HLA-DR7 – 0/1<br>HLA-DRB3 – 0/1<br>HLA-DRB4 – 0/1<br>HLA-DRB5 – 0/1 |
| 48 | RTNEEFDPV        | 88260 | 9  | 239-247 | Vaccinia | 2 publications, tested in 2 MHC ligand assays                     | HLA-A*02:01 – 2/2                                                                                                                                                                                                                                                                                  |

|    |                 |        |    |         |          |                                               |                                                                                                                                                                                                                              |
|----|-----------------|--------|----|---------|----------|-----------------------------------------------|------------------------------------------------------------------------------------------------------------------------------------------------------------------------------------------------------------------------------|
| 49 | SLEATYHII       | 88786  | 9  | 273-281 | Vaccinia | 2 publications, tested in 2 MHC ligand assays | HLA-A*02:01 – 2/2                                                                                                                                                                                                            |
| 50 | SLEATYHIII      | 88787  | 10 | 273-282 | Vaccinia | 2 publications, tested in 2 MHC ligand assays | HLA-A*02:01 – 2/2                                                                                                                                                                                                            |
| 51 | TINCDVGYEV      | 89490  | 10 | 154-163 | Vaccinia | 2 publications, tested in 2 MHC ligand assays | HLA-A*02:01 – 2/2                                                                                                                                                                                                            |
| 52 | TISVVTLLCV      | 89501  | 10 | 3-12    | Vaccinia | 2 publications, tested in 2 MHC ligand assays | HLA-A*02:01 – 2/2                                                                                                                                                                                                            |
| 53 | TVSDYISEL       | 89811  | 9  | 77-85   | Vaccinia | 2 publications, tested in 2 MHC ligand assays | HLA-A*02:01 – 2/2                                                                                                                                                                                                            |
| 54 | VIFLISVIVL      | 90018  | 10 | 290-299 | Vaccinia | 2 publications, tested in 2 MHC ligand assays | HLA-A*02:01 – 2/2                                                                                                                                                                                                            |
| 55 | VTLLCVLPA       | 90449  | 9  | 7-15    | Vaccinia | 2 publications, tested in 2 MHC ligand assays | HLA-A*02:01 – 2/2                                                                                                                                                                                                            |
| 56 | VTLLCVLPAV      | 90450  | 10 | 7-16    | Vaccinia | 2 publications, tested in 2 MHC ligand assays | HLA-A*02:01 – 2/2                                                                                                                                                                                                            |
| 57 | VVTLLCVLPA      | 90519  | 10 | 6-15    | Vaccinia | 2 publications, tested in 2 MHC ligand assays | HLA-A*02:01 – 2/2                                                                                                                                                                                                            |
| 58 | VVYSTCTVPT      | 90523  | 10 | 16-25   | Vaccinia | 2 publications, tested in 2 MHC ligand assays | HLA-A*02:01 – 2/2                                                                                                                                                                                                            |
| 59 | YISELYNKPL      | 90789  | 10 | 81-90   | Vaccinia | 2 publications, tested in 2 MHC ligand assays | HLA-A*02:01 – 2/2                                                                                                                                                                                                            |
| 60 | CDVGYEVIGASYISC | 103081 | 15 | 157-171 | Vaccinia | Tested in 12 MHC ligand assays                | HLA-DR1 – 1/1<br>HLA-DR3 – 1/1<br>HLA-DR4 – 1/1<br>HLA-DR7 – 1/1<br>HLA-DPB1*04:01 – 0/1<br>HLA-DPB1*04:02 – 0/1<br>HLA-DR11 – 0/1<br>HLA-DR13 – 0/1<br>HLA-DR15 – 0/1<br>HLA-DRB3 – 0/1<br>HLA-DRB4 – 0/1<br>HLA-DRB5 – 0/1 |
| 61 | DKWKYENPCKKMCTV | 103108 | 15 | 64-78   | Vaccinia | Tested in 12 MHC ligand assays                | HLA-DRB5 – 1/1<br>HLA-DPB1*04:01 – 0/1<br>HLA-DPB1*04:02 – 0/1<br>HLA-DR1 – 0/1<br>HLA-DR11 – 0/1                                                                                                                            |

|    |                  |        |    |         |          |                                                    |                                                                                                                                                                                                                              |
|----|------------------|--------|----|---------|----------|----------------------------------------------------|------------------------------------------------------------------------------------------------------------------------------------------------------------------------------------------------------------------------------|
|    |                  |        |    |         |          |                                                    | HLA-DR13 – 0/1<br>HLA-DR15 – 0/1<br>HLA-DR3 – 0/1<br>HLA-DR4 – 0/1<br>HLA-DR7 – 0/1<br>HLA-DRB3 – 0/1<br>HLA-DRB4 – 0/1                                                                                                      |
| 62 | EKYSFGGEYMTINCDV | 103142 | 15 | 145-159 | Vaccinia | Tested in 12 MHC ligand assays                     | HLA-DR1 – 1/1<br>HLA-DR13 – 1/1<br>HLA-DPB1*04:01 – 0/1<br>HLA-DPB1*04:02 – 0/1<br>HLA-DR11 – 0/1<br>HLA-DR15 – 0/1<br>HLA-DR3 – 0/1<br>HLA-DR4 – 0/1<br>HLA-DR7 – 0/1<br>HLA-DRB3 – 0/1<br>HLA-DRB4 – 0/1<br>HLA-DRB5 – 0/1 |
| 63 | EVIGASYISCTANSW  | 103155 | 15 | 162-176 | Vaccinia | Tested in 12 MHC ligand assays                     | HLA-DR1 – 1/1<br>HLA-DR4 – 1/1<br>HLA-DPB1*04:01 – 0/1<br>HLA-DPB1*04:02 – 0/1<br>HLA-DR11 – 0/1<br>HLA-DR13 – 0/1<br>HLA-DR15 – 0/1<br>HLA-DR3 – 0/1<br>HLA-DR7 – 0/1<br>HLA-DRB3 – 0/1<br>HLA-DRB4 – 0/1<br>HLA-DRB5 – 0/1 |
| 64 | GEYMTINCDVGYEVI  | 103204 | 15 | 150-164 | Vaccinia | Tested in 12 MHC ligand assays                     | HLA-DR1 – 1/1<br>HLA-DR15 – 1/1<br>HLA-DRB3 – 1/1<br>HLA-DPB1*04:01 – 0/1<br>HLA-DPB1*04:02 – 0/1<br>HLA-DR11 – 0/1<br>HLA-DR13 – 0/1<br>HLA-DR3 – 0/1<br>HLA-DR4 – 0/1<br>HLA-DR7 – 0/1<br>HLA-DRB4 – 0/1<br>HLA-DRB5 – 0/1 |
| 65 | GGVIHLSCKSGFILT  | 103218 | 15 | 204-218 | Vaccinia | Tested in 9 T cell assays and 12 MHC ligand assays | T cell assays:<br>IFN $\gamma$ release – 9/9<br>MHC ligand assays:<br>HLA-DPB1*04:02 – 1/1<br>HLA-DR1 – 1/1<br>HLA-DR11 – 1/1<br>HLA-DR13 – 1/1                                                                              |

|    |                 |        |    |         |          |                                                     |                                                                                                                                                                                                                                                                                                      |
|----|-----------------|--------|----|---------|----------|-----------------------------------------------------|------------------------------------------------------------------------------------------------------------------------------------------------------------------------------------------------------------------------------------------------------------------------------------------------------|
|    |                 |        |    |         |          |                                                     | HLA-DR15 – 1/1<br>HLA-DR3 – 1/1<br>HLA-DR4 – 1/1<br>HLA-DR7 – 1/1<br>HLA-DRB4 – 1/1<br>HLA-DRB5 – 1/1<br>HLA-DPB1*04:01 – 0/1<br>HLA-DRB3 – 0/1                                                                                                                                                      |
| 66 | GKWNPVLPICVRTNE | 103225 | 15 | 228-242 | Vaccinia | Tested in 12 MHC ligand assays                      | HLA-DR15 – 1/1<br>HLA-DR7 – 1/1<br>HLA-DPB1*04:01 – 0/1<br>HLA-DPB1*04:02 – 0/1<br>HLA-DR1 – 0/1<br>HLA-DR11 – 0/1<br>HLA-DR13 – 0/1<br>HLA-DR3 – 0/1<br>HLA-DR4 – 0/1<br>HLA-DRB3 – 0/1<br>HLA-DRB4 – 0/1<br>HLA-DRB5 – 0/1                                                                         |
| 67 | ISVVTLLCVLPVVY  | 103288 | 15 | 4-18    | Vaccinia | Tested in 10 T cell assays and 12 MHC ligand assays | T cell assays:<br>IFN $\gamma$ release – 10/10<br>MHC ligand assays:<br>HLA-DR1 – 1/1<br>HLA-DR11 – 1/1<br>HLA-DR13 – 1/1<br>HLA-DR3 – 1/1<br>HLA-DR4 – 1/1<br>HLA-DPB1*04:01 – 0/1<br>HLA-DPB1*04:02 – 0/1<br>HLA-DR15 – 0/1<br>HLA-DR7 – 0/1<br>HLA-DRB3 – 0/1<br>HLA-DRB4 – 0/1<br>HLA-DRB5 – 0/1 |
| 68 | IVLVCSCDKNNDSC  | 103295 | 15 |         | Vaccinia | Tested in 12 MHC ligand assays                      | HLA-DR4 – 1/1<br>HLA-DRB4 – 1/1<br>HLA-DPB1*04:01 – 0/1<br>HLA-DPB1*04:02 – 0/1<br>HLA-DR1 – 0/1<br>HLA-DR11 – 0/1<br>HLA-DR13 – 0/1<br>HLA-DR15 – 0/1<br>HLA-DR3 – 0/1<br>HLA-DR7 – 0/1<br>HLA-DRB3 – 0/1<br>HLA-DRB5 – 0/1                                                                         |
| 69 | KDVVQYEQEIESLEA | 103302 | 15 | 262-276 | Vaccinia | Tested in 12 MHC ligand assays                      | HLA-DR11 – 1/1<br>HLA-DR15 – 1/1<br>HLA-DR3 – 1/1                                                                                                                                                                                                                                                    |

|    |                 |        |    |         |          |                                                    |                                                                                                                                                                                                                                                                                                    |
|----|-----------------|--------|----|---------|----------|----------------------------------------------------|----------------------------------------------------------------------------------------------------------------------------------------------------------------------------------------------------------------------------------------------------------------------------------------------------|
|    |                 |        |    |         |          |                                                    | HLA-DPB1*04:01 – 0/1<br>HLA-DPB1*04:02 – 0/1<br>HLA-DR1 – 0/1<br>HLA-DR13 – 0/1<br>HLA-DR4 – 0/1<br>HLA-DR7 – 0/1<br>HLA-DRB3 – 0/1<br>HLA-DRB4 – 0/1<br>HLA-DRB5 – 0/1                                                                                                                            |
| 70 | KPLYEVNSTMTLSCN | 103319 | 15 | 88-102  | Vaccinia | Tested in 12 MHC ligand assays                     | HLA-DR11 – 1/1<br>HLA-DR4 – 1/1<br>HLA-DR7 – 1/1<br>HLA-DPB1*04:01 – 0/1<br>HLA-DPB1*04:02 – 0/1<br>HLA-DR1 – 0/1<br>HLA-DR13 – 0/1<br>HLA-DR15 – 0/1<br>HLA-DR3 – 0/1<br>HLA-DRB3 – 0/1<br>HLA-DRB4 – 0/1<br>HLA-DRB5 – 0/1                                                                       |
| 71 | LCVLPAVVYSTCTVP | 103341 | 15 | 10-24   | Vaccinia | Tested in 12 MHC ligand assays                     | HLA-DR1 – 1/1<br>HLA-DR15 – 1/1<br>HLA-DR3 – 1/1<br>HLA-DR4 – 1/1<br>HLA-DR7 – 1/1<br>HLA-DPB1*04:01 – 0/1<br>HLA-DPB1*04:02 – 0/1<br>HLA-DR11 – 0/1<br>HLA-DR13 – 0/1<br>HLA-DRB3 – 0/1<br>HLA-DRB4 – 0/1<br>HLA-DRB5 – 0/1                                                                       |
| 72 | NSWNVIPSCQQKCDI | 103450 | 15 | 174-188 | Vaccinia | Tested in 2 T cell assays and 12 MHC ligand assays | T cell assays:<br>IFN $\gamma$ release – 2/2<br>MHC ligand assays:<br>HLA-DR11 – 1/1<br>HLA-DR4 – 1/1<br>HLA-DPB1*04:01 – 0/1<br>HLA-DPB1*04:02 – 0/1<br>HLA-DR1 – 0/1<br>HLA-DR13 – 0/1<br>HLA-DR15 – 0/1<br>HLA-DR3 – 0/1<br>HLA-DR7 – 0/1<br>HLA-DRB3 – 0/1<br>HLA-DRB4 – 0/1<br>HLA-DRB5 – 0/1 |
| 73 | PAVVYSTCTVPTMNN | 103461 | 15 | 14-28   | Vaccinia | Tested in 12 MHC ligand assays                     | HLA-DR13 – 1/1<br>HLA-DR3 – 1/1                                                                                                                                                                                                                                                                    |

|    |                 |        |    |         |          |                                                    |                                                                                                                                                                                                                                                                                                    |
|----|-----------------|--------|----|---------|----------|----------------------------------------------------|----------------------------------------------------------------------------------------------------------------------------------------------------------------------------------------------------------------------------------------------------------------------------------------------------|
|    |                 |        |    |         |          |                                                    | HLA-DR4 – 1/1<br>HLA-DPB1*04:01 – 0/1<br>HLA-DPB1*04:02 – 0/1<br>HLA-DR1 – 0/1<br>HLA-DR11 – 0/1<br>HLA-DR15 – 0/1<br>HLA-DR7 – 0/1<br>HLA-DRB3 – 0/1<br>HLA-DRB4 – 0/1<br>HLA-DRB5 – 0/1                                                                                                          |
| 74 | QEIESLEATYHIIIV | 103517 | 15 | 269-283 | Vaccinia | Tested in 6 T cell assays and 12 MHC ligand assays | T cell assays:<br>IFN $\gamma$ release – 6/6<br>MHC ligand assays:<br>HLA-DR1 – 1/1<br>HLA-DR15 – 1/1<br>HLA-DR3 – 1/1<br>HLA-DR7 – 1/1<br>HLA-DPB1*04:01 – 0/1<br>HLA-DPB1*04:02 – 0/1<br>HLA-DR11 – 0/1<br>HLA-DR13 – 0/1<br>HLA-DR4 – 0/1<br>HLA-DRB3 – 0/1<br>HLA-DRB4 – 0/1<br>HLA-DRB5 – 0/1 |
| 75 | SDYISELYNKPLYEV | 103586 | 15 | 79-93   | Vaccinia | Tested in 2 T cell assays and 12 MHC ligand assays | T cell assays:<br>IFN $\gamma$ release – 2/2<br>MHC ligand assays:<br>HLA-DPB1*04:02 – 1/1<br>HLA-DR15 – 1/1<br>HLA-DPB1*04:01 – 0/1<br>HLA-DR1 – 0/1<br>HLA-DR11 – 0/1<br>HLA-DR13 – 0/1<br>HLA-DR3 – 0/1<br>HLA-DR4 – 0/1<br>HLA-DR7 – 0/1<br>HLA-DRB3 – 0/1<br>HLA-DRB4 – 0/1<br>HLA-DRB5 – 0/1 |
| 76 | SGFILTGSPSSTCID | 103593 | 15 | 213-227 | Vaccinia | Tested in 12 MHC ligand assays                     | HLA-DR4 – 1/1<br>HLA-DR7 – 1/1<br>HLA-DPB1*04:01 – 0/1<br>HLA-DPB1*04:02 – 0/1<br>HLA-DR1 – 0/1<br>HLA-DR11 – 0/1<br>HLA-DR13 – 0/1<br>HLA-DR15 – 0/1<br>HLA-DR3 – 0/1<br>HLA-DRB3 – 0/1<br>HLA-DRB4 – 0/1                                                                                         |

|    |                 |        |    |         |          |                                |                                                                                                                                                                                                                              |
|----|-----------------|--------|----|---------|----------|--------------------------------|------------------------------------------------------------------------------------------------------------------------------------------------------------------------------------------------------------------------------|
|    |                 |        |    |         |          |                                | HLA-DRB5 – 0/1                                                                                                                                                                                                               |
| 77 | TCIDGKWNPVLPICV | 103637 | 15 | 224-238 | Vaccinia | Tested in 12 MHC ligand assays | HLA-DR4 – 1/1<br>HLA-DR7 – 1/1<br>HLA-DPB1*04:01 – 0/1<br>HLA-DPB1*04:02 – 0/1<br>HLA-DR1 – 0/1<br>HLA-DR11 – 0/1<br>HLA-DR13 – 0/1<br>HLA-DR15 – 0/1<br>HLA-DR3 – 0/1<br>HLA-DRB3 – 0/1<br>HLA-DRB4 – 0/1<br>HLA-DRB5 – 0/1 |
| 78 | TDLSKLSKDVVQYEQ | 103639 | 15 | 255-269 | Vaccinia | Tested in 12 MHC ligand assays | HLA-DR3 – 1/1<br>HLA-DPB1*04:01 – 0/1<br>HLA-DPB1*04:02 – 0/1<br>HLA-DR1 – 0/1<br>HLA-DR11 – 0/1<br>HLA-DR13 – 0/1<br>HLA-DR15 – 0/1<br>HLA-DR4 – 0/1<br>HLA-DR7 – 0/1<br>HLA-DRB3 – 0/1<br>HLA-DRB4 – 0/1<br>HLA-DRB5 – 0/1 |
| 79 | TSFNNNQKVTFTCDQ | 103670 | 15 | 36-50   | Vaccinia | Tested in 12 MHC ligand assays | HLA-DR13 – 1/1<br>HLA-DR3 – 1/1<br>HLA-DPB1*04:01 – 0/1<br>HLA-DPB1*04:02 – 0/1<br>HLA-DR1 – 0/1<br>HLA-DR11 – 0/1<br>HLA-DR15 – 0/1<br>HLA-DR4 – 0/1<br>HLA-DR7 – 0/1<br>HLA-DRB3 – 0/1<br>HLA-DRB4 – 0/1<br>HLA-DRB5 – 0/1 |
| 80 | VTLLCVLPAVVYSTC | 103719 | 15 | 7-21    | Vaccinia | Tested in 12 MHC ligand assays | HLA-DPB1*04:02 – 1/1<br>HLA-DR1 – 1/1<br>HLA-DR13 – 1/1<br>HLA-DR15 – 1/1<br>HLA-DR3 – 1/1<br>HLA-DRB3 – 1/1<br>HLA-DRB4 – 1/1<br>HLA-DRB5 – 1/1<br>HLA-DPB1*04:01 – 0/1<br>HLA-DR11 – 0/1<br>HLA-DR4 – 0/1<br>HLA-DR7 – 0/1 |



|    |                  |        |    |         |          |                              |                            |
|----|------------------|--------|----|---------|----------|------------------------------|----------------------------|
| 81 | AKLTSTETSFNNNQKV | 139997 | 16 | 29-44   | Vaccinia | Tested in 1 T cell assay     | IFN $\gamma$ release – 1/1 |
| 82 | CETDKWKYENPCKKMC | 140004 | 16 | 61-76   | Vaccinia | Tested in 1 T cell assay     | IFN $\gamma$ release – 1/1 |
| 83 | CTVPTMNNAKLTSTET | 140009 | 16 | 21-36   | Vaccinia | Tested in 1 T cell assay     | IFN $\gamma$ release – 1/1 |
| 84 | FSIGGVHLSCKSGFI  | 140025 | 16 | 201-216 | Vaccinia | Tested in 1 T cell assay     | IFN $\gamma$ release – 1/1 |
| 85 | GVIFLISVIVLVCSCD | 140030 | 16 | 289-304 | Vaccinia | Tested in 1 T cell assay     | IFN $\gamma$ release – 1/1 |
| 86 | IIVALTIMGVIFLISV | 140036 | 16 | 281-296 | Vaccinia | Tested in 1 T cell assay     | IFN $\gamma$ release – 1/1 |
| 87 | ITINCDVGYEVIGASY | 140038 | 16 | 153-168 | Vaccinia | Tested in 1 T cell assay     | IFN $\gamma$ release – 1/1 |
| 88 | LYNKPLYEVNSTMTLS | 140052 | 16 | 85-100  | Vaccinia | Tested in 1 T cell assay     | IFN $\gamma$ release – 1/1 |
| 89 | PNAVCETDKWKYENPC | 140061 | 16 | 57-72   | Vaccinia | Tested in 1 T cell assay     | IFN $\gamma$ release – 1/1 |
| 90 | SGSTFSIGGVHLSCK  | 140069 | 16 | 197-212 | Vaccinia | Tested in 1 T cell assay     | IFN $\gamma$ release – 1/1 |
| 91 | VYSTCTVPTMNNAKLT | 140078 | 16 | 17-32   | Vaccinia | Tested in 1 T cell assay     |                            |
| 92 | CSCDKNNDQY       | 189049 | 10 | 301-310 | Vaccinia | Tested in 1 MHC ligand assay | HLA-A*01:01 – 1/1          |
| 93 | VSDYISELYNKPLYE  | 874748 | 15 | 78-92   | Vaccinia | Tested in 1 MHC ligand assay | HLA-DPB1*04:01 – 1/1       |
| 94 | GVIFLISVIVLVCSCN | 140031 | 16 | 289-304 | Variola  | Tested in 1 T cell assay     | IFN $\gamma$ release – 1/1 |

**Table S8.** List of B cell epitopes (antigen B6R-B7R-B5R)

| B6R-B7R-B5R (MPXV, VARV, and VACV) – Consensus sequence                                                                                                                                                                                                                                                                                                                                                 | Predicted linear epitopes | Position |
|---------------------------------------------------------------------------------------------------------------------------------------------------------------------------------------------------------------------------------------------------------------------------------------------------------------------------------------------------------------------------------------------------------|---------------------------|----------|
| >Consensus/1-317 Percentage Identity Consensus<br>MKTISVVTLLCVLPVAVYSTCTVPTMNNAKLTSTETSFNDKQK<br>VTFTCDQGYHSLDPNAVCECTDKWKYENPCKKMCTVSDYVSE<br>LYNKPLYEVNSTMTLSCNGETKYFRCEEKNGNTSWNDTVTCP<br>NAECQPLQLEHGSCQPVKEKYSFGEYMTINCDVGYEVIGASYI<br>SCTANSWNVIPSCQQKCDIPSLSNGLISGSTFSIGGVHLSCKSGF<br>TLTGSPSSCIDGKWNPIPTCVRSEEFDPVDDGPDDETDLK<br>LSKDVVQYEQEIESLEATYHIIIVALTIMGVIFLISVIVLVCSCDK<br>NNDQYKFHKLLP | VSELYNKPLY                | 81-90    |
|                                                                                                                                                                                                                                                                                                                                                                                                         | EEKNGNTSW<br>NDTV         | 110-122  |
|                                                                                                                                                                                                                                                                                                                                                                                                         | PDDDETDLK<br>SKD          | 250-262  |

**Table S9.** List of T cell epitopes (antigen M1R-M1R-L1R) containing conserved amino acid sequences (origin VACV)

| # | Epitope    | Epitope ID | Length | Position | Publications/Assays                                               | Summary                                                                                                                                                                                           |
|---|------------|------------|--------|----------|-------------------------------------------------------------------|---------------------------------------------------------------------------------------------------------------------------------------------------------------------------------------------------|
| 1 | AALFMYYAK  | 275        | 9      | 197-205  | Tested in 5 MHC ligand assays                                     | HLA-A*03:01 – 1/1<br>HLA-A*11:01 – 1/1<br>HLA-A*31:01 – 1/1<br>HLA-A*68:01 – 1/1<br>HLA-A*33:01 – 0/1                                                                                             |
| 2 | AALFMYYAKR | 276        | 10     | 197-206  | Tested in 5 MHC ligand assays                                     | HLA-A*03:01 – 1/1<br>HLA-A*11:01 – 1/1<br>HLA-A*31:01 – 1/1<br>HLA-A*33:01 – 1/1<br>HLA-A*68:01 – 1/1                                                                                             |
| 3 | ALFMYYAKR  | 2543       | 9      | 198-206  | 3 publications, tested in 5 T cell assays and 6 MHC ligand assays | T cell assays:<br>IFN $\gamma$ release – 0/5<br>MHC ligand assays:<br>HLA-A*03:01 – 1/1<br>HLA-A*11:01 – 1/1<br>HLA-A*31:01 – 1/1<br>HLA-A*33:01 – 1/1<br>HLA-A*68:01 – 1/1<br>Patr-A*01:01 – 1/1 |
| 4 | AMFTAALNI  | 3091       | 9      | 89-97    | 5 publications, tested in 2 T cell assays and 3 MHC ligand assays | T cell assays:<br>IFN $\gamma$ release – 0/2<br>MHC ligand assays:<br>HLA-A*02:01 – 2/2                                                                                                           |

|   |            |       |    |         |                                                                   |                                                                                                                                                                             |
|---|------------|-------|----|---------|-------------------------------------------------------------------|-----------------------------------------------------------------------------------------------------------------------------------------------------------------------------|
|   |            |       |    |         |                                                                   | HLA-A*32:01 – 1/1                                                                                                                                                           |
| 5 | APGSPTNLEF | 3583  | 10 | 139-148 | Tested in 5 MHC ligand assays                                     | HLA-B*07:02 – 1/1<br>HLA-B*35:01 – 1/1<br>HLA-B*53:01 – 1/1<br>HLA-B*51:01 – 0/1<br>HLA-B*54:01 – 0/1                                                                       |
| 6 | APKQVAGTGV | 3623  | 10 | 175-184 | Tested in 5 MHC ligand assays                                     | HLA-B*07:02 – 1/1<br>HLA-B*54:01 – 1/1<br>HLA-B*35:01 – 0/1<br>HLA-B*51:01 – 0/1<br>HLA-B*53:01 – 0/1                                                                       |
| 7 | AVLSAATETY | 5452  | 10 | 67-76   | 3 publications, tested in 5 T cell assays and 5 MHC ligand assays | T cell assays:<br>IFN $\gamma$ release – 0/5<br>MHC ligand assays:<br>HLA-A*03:01 – 1/1<br>HLA-A*11:01 – 1/1<br>HLA-A*68:01 – 1/1<br>HLA-A*31:01 – 0/1<br>HLA-A*33:01 – 0/1 |
| 8 | DIEIGNFYIR | 8617  | 10 | 35-44   | Tested in 5 MHC ligand assays                                     | HLA-A*03:01 – 1/1<br>HLA-A*31:01 – 1/1<br>HLA-A*33:01 – 1/1<br>HLA-A*68:01 – 1/1<br>HLA-A*11:01 – 0/1                                                                       |
| 9 | EANASQTK   | 11145 | 9  | 25-33   | Tested in 5 MHC ligand assays                                     | HLA-A*03:01 – 1/1                                                                                                                                                           |

|    |                      |       |    |         |                                                 |                                                                                                       |
|----|----------------------|-------|----|---------|-------------------------------------------------|-------------------------------------------------------------------------------------------------------|
|    |                      |       |    |         |                                                 | HLA-A*11:01 – 1/1<br>HLA-A*68:01 – 1/1<br>HLA-A*31:01 – 0/1<br>HLA-A*33:01 – 0/1                      |
| 10 | EFINTGSSK            | 12016 | 9  | 147-155 | Tested in 5 MHC ligand assays                   | HLA-A*33:01 – 1/1<br>HLA-A*68:01 – 1/1<br>HLA-A*03:01 – 0/1<br>HLA-A*11:01 – 0/1<br>HLA-A*31:01 – 0/1 |
| 11 | FTSTNDKIK            | 18080 | 9  | 209-217 | Tested in 5 MHC ligand assays                   | HLA-A*03:01 – 1/1<br>HLA-A*11:01 – 1/1<br>HLA-A*68:01 – 1/1<br>HLA-A*31:01 – 0/1<br>HLA-A*33:01 – 0/1 |
| 12 | GSSKGNCAIK           | 22513 | 10 | 152-161 | Tested in 5 MHC ligand assays                   | HLA-A*03:01 – 1/1<br>HLA-A*11:01 – 1/1<br>HLA-A*31:01 – 1/1<br>HLA-A*68:01 – 1/1<br>HLA-A*33:01 – 0/1 |
| 13 | GTGVQFYMIVIGVILAALFM | 22681 | 21 | 281-201 | Tested in 1 T cell assay and 1 MHC ligand assay | T cell assays:<br>IFN $\gamma$ release – 0/1<br>MHC ligand assays:<br>HLA-DRB1*01:01 – 1/1            |
| 14 | IILAALFMY            | 26560 | 9  | 194-202 | Tested in 5 MHC ligand assays                   | HLA-A*03:01 – 1/1<br>HLA-A*11:01 – 1/1                                                                |

|    |             |       |    |         |                                                                   |                                                                                                                                                                             |
|----|-------------|-------|----|---------|-------------------------------------------------------------------|-----------------------------------------------------------------------------------------------------------------------------------------------------------------------------|
|    |             |       |    |         |                                                                   | HLA-A*31:01 – 0/1<br>HLA-A*33:01 – 0/1<br>HLA-A*68:01 – 0/1                                                                                                                 |
| 15 | IILAALFMY Y | 26561 | 10 | 194-203 | Tested in 5 MHC ligand assays                                     | HLA-A*03:01 – 1/1<br>HLA-A*11:01 – 1/1<br>HLA-A*68:01 – 1/1<br>HLA-A*31:01 – 0/1<br>HLA-A*33:01 – 0/1                                                                       |
| 16 | ILAALFMY Y  | 26947 | 9  | 195-203 | 3 publications, tested in 7 T cell assays and 5 MHC ligand assays | T cell assays:<br>IFN $\gamma$ release – 0/7<br>MHC ligand assays:<br>HLA-A*03:01 – 1/1<br>HLA-A*11:01 – 1/1<br>HLA-A*68:01 – 1/1<br>HLA-A*31:01 – 0/1<br>HLA-A*33:01 – 0/1 |
| 17 | IQTSVNTVVR  | 28239 | 10 | 97-106  | 3 publications, tested in 5 T cell assays and 5 MHC ligand assays | T cell assays:<br>IFN $\gamma$ release – 0/5<br>MHC ligand assays:<br>HLA-A*31:01 – 1/1<br>HLA-A*68:01 – 1/1<br>HLA-A*03:01 – 0/1<br>HLA-A*11:01 – 0/1<br>HLA-A*33:01 – 0/1 |
| 18 | IVIGVILA    | 29307 | 9  | 189-197 | 4 publications, tested in 2 T cell assays and 2 MHC ligand assays | T cell assays:<br>IFN $\gamma$ release – 0/2                                                                                                                                |

|    |             |       |    |         |                                                                   |                                                                                                                            |
|----|-------------|-------|----|---------|-------------------------------------------------------------------|----------------------------------------------------------------------------------------------------------------------------|
|    |             |       |    |         |                                                                   | MHC ligand assays:<br>HLA-A*02:01 – 2/2                                                                                    |
| 19 | KALMQLTTK   | 29865 | 9  | 161-169 | Tested in 5 MHC ligand assays                                     | HLA-A*03:01 – 1/1<br>HLA-A*11:01 – 1/1<br>HLA-A*31:01 – 1/1<br>HLA-A*33:01 – 0/1<br>HLA-A*68:01 – 0/1                      |
| 20 | KATTQIAPK   | 29964 | 9  | 169-177 | Tested in 5 MHC ligand assays                                     | HLA-A*03:01 – 1/1<br>HLA-A*11:01 – 1/1<br>HLA-A*31:01 – 1/1<br>HLA-A*33:01 – 0/1<br>HLA-A*68:01 – 0/1                      |
| 21 | KIKLILANK   | 31291 | 9  | 215-223 | 2 publications, tested in 6 MHC ligand assays                     | HLA-A*03:01 – 1/1<br>HLA-A*11:01 – 1/1<br>HLA-A*30:01 – 1/1<br>HLA-A*31:01 – 1/1<br>HLA-A*33:01 – 0/1<br>HLA-A*68:01 – 0/1 |
| 22 | KIQNVIIDECY | 31403 | 11 | 127-137 | 2 publications, tested in 1 T cell assay and 1 MHC ligand assay   | T cell assays:<br>IFN $\gamma$ release – 1/1<br>MHC ligand assays:<br>HLA-DRB4*01:01 – 1/1                                 |
| 23 | LAALFMYYA   | 34676 | 9  | 196-204 | 4 publications, tested in 2 T cell assays and 2 MHC ligand assays | T cell assays:<br>IFN $\gamma$ release – 0/2<br>MHC ligand assays:                                                         |

|    |            |       |    |         |                                                                   |                                                                                                                                                                             |
|----|------------|-------|----|---------|-------------------------------------------------------------------|-----------------------------------------------------------------------------------------------------------------------------------------------------------------------------|
|    |            |       |    |         |                                                                   | HLA-A*02:01 – 2/2                                                                                                                                                           |
| 24 | LAALFMYYAK | 34677 | 10 | 196-205 | Tested in 6 MHC ligand assays                                     | HLA-A*03:01 – 1/1<br>HLA-A*11:01 – 1/1<br>HLA-A*31:01 – 1/1<br>HLA-A*68:01 – 1/1<br>HLA-A*33:01 – 0/1<br>Patr-A*01:01 – 0/1                                                 |
| 25 | LFTSTNDKIK | 36006 | 10 | 208-217 | Tested in 5 MHC ligand assays                                     | HLA-A*11:01 – 1/1<br>HLA-A*68:01 – 1/1<br>HLA-A*03:01 – 0/1<br>HLA-A*31:01 – 0/1<br>HLA-A*33:01 – 0/1                                                                       |
| 26 | MLFTSTNDK  | 41940 | 9  | 207-215 | 3 publications, tested in 5 T cell assays and 5 MHC ligand assays | T cell assays:<br>IFN $\gamma$ release – 0/5<br>MHC ligand assays:<br>HLA-A*03:01 – 1/1<br>HLA-A*11:01 – 1/1<br>HLA-A*68:01 – 1/1<br>HLA-A*31:01 – 0/1<br>HLA-A*33:01 – 0/1 |
| 27 | NSSAVVDNK  | 45970 | 9  | 117-125 | Tested in 5 MHC ligand assays                                     | HLA-A*11:01 – 1/1<br>HLA-A*68:01 – 1/1<br>HLA-A*03:01 – 0/1<br>HLA-A*31:01 – 0/1<br>HLA-A*33:01 – 0/1                                                                       |

|    |             |       |    |         |                               |                                                                                                       |
|----|-------------|-------|----|---------|-------------------------------|-------------------------------------------------------------------------------------------------------|
| 28 | NTLSERISSK  | 46167 | 10 | 12-21   | Tested in 5 MHC ligand assays | HLA-A*03:01 – 1/1<br>HLA-A*11:01 – 1/1<br>HLA-A*31:01 – 1/1<br>HLA-A*33:01 – 1/1<br>HLA-A*68:01 – 1/1 |
| 29 | NTVVRFDFENY | 46311 | 10 | 102-111 | Tested in 5 MHC ligand assays | HLA-A*11:01 – 1/1<br>HLA-A*68:01 – 1/1<br>HLA-A*03:01 – 0/1<br>HLA-A*31:01 – 0/1<br>HLA-A*33:01 – 0/1 |
| 30 | QTSVNTVVR   | 52633 | 9  | 98-106  | Tested in 5 MHC ligand assays | HLA-A*11:01 – 1/1<br>HLA-A*31:01 – 1/1<br>HLA-A*68:01 – 1/1<br>HLA-A*03:01 – 0/1<br>HLA-A*33:01 – 0/1 |
| 31 | QTTVNTLSER  | 52649 | 10 | 8-17    | Tested in 5 MHC ligand assays | HLA-A*03:01 – 1/1<br>HLA-A*11:01 – 1/1<br>HLA-A*31:01 – 1/1<br>HLA-A*33:01 – 1/1<br>HLA-A*68:01 – 1/1 |
| 32 | QVAGTGVQFY  | 52676 | 10 | 178-187 | Tested in 5 MHC ligand assays | HLA-A*03:01 – 1/1<br>HLA-A*11:01 – 1/1<br>HLA-A*68:01 – 1/1<br>HLA-A*31:01 – 0/1<br>HLA-A*33:01 – 0/1 |



|    |            |       |    |         |                               |                                                                                                                      |
|----|------------|-------|----|---------|-------------------------------|----------------------------------------------------------------------------------------------------------------------|
| 33 | RMLFTSTNDK | 54917 | 10 | 206-215 | Tested in 5 MHC ligand assays | HLA-A*03:01<br>– 1/1<br>HLA-A*11:01<br>– 1/1<br>HLA-A*31:01<br>– 1/1<br>HLA-A*68:01<br>– 1/1<br>HLA-A*33:01<br>– 0/1 |
| 34 | SAVVVDNKLK | 57041 | 9  | 119-127 | Tested in 5 MHC ligand assays | HLA-A*11:01<br>– 1/1<br>HLA-A*68:01<br>– 1/1<br>HLA-A*03:01<br>– 0/1<br>HLA-A*31:01<br>– 0/1<br>HLA-A*33:01<br>– 0/1 |
| 35 | SPMVIATTDM | 60160 | 10 | 239-248 | Tested in 5 MHC ligand assays | HLA-B*07:02<br>– 1/1<br>HLA-B*35:01<br>– 1/1<br>HLA-B*53:01<br>– 1/1<br>HLA-B*54:01<br>– 1/1<br>HLA-B*51:01<br>– 0/1 |
| 36 | SSAVVDNKLK | 60916 | 10 | 118-127 | Tested in 5 MHC ligand assays | HLA-A*03:01<br>– 1/1<br>HLA-A*11:01<br>– 1/1<br>HLA-A*31:01<br>– 1/1<br>HLA-A*68:01<br>– 1/1<br>HLA-A*33:01<br>– 0/1 |
| 37 | SSKGNCAIK  | 61137 | 9  | 153-161 | Tested in 5 MHC ligand assays | HLA-A*11:01<br>– 1/1<br>HLA-A*31:01<br>– 1/1<br>HLA-A*68:01<br>– 1/1<br>HLA-A*03:01<br>– 0/1<br>HLA-A*33:01<br>– 0/1 |

|    |            |       |    |         |                                                                   |                                                                                                                                                                                                   |
|----|------------|-------|----|---------|-------------------------------------------------------------------|---------------------------------------------------------------------------------------------------------------------------------------------------------------------------------------------------|
| 38 | TLSERISSK  | 65058 | 9  | 13-21   | Tested in 5 MHC ligand assays                                     | HLA-A*03:01<br>– 1/1<br>HLA-A*11:01<br>– 1/1<br>HLA-A*31:01<br>– 1/1<br>HLA-A*68:01<br>– 1/1<br>HLA-A*33:01<br>– 0/1                                                                              |
| 39 | TPEQKAYVPA | 65559 | 10 | 80-89   | Tested in 5 MHC ligand assays                                     | HLA-B*07:02<br>– 1/1<br>HLA-B*54:01<br>– 1/1<br>HLA-B*35:01<br>– 0/1<br>HLA-B*51:01<br>– 0/1<br>HLA-B*53:01<br>– 0/1                                                                              |
| 40 | TTVNTLSER  | 66897 | 9  | 9-17    | Tested in 5 MHC ligand assays                                     | HLA-A*11:01<br>– 1/1<br>HLA-A*31:01<br>– 1/1<br>HLA-A*33:01<br>– 1/1<br>HLA-A*68:01<br>– 1/1<br>HLA-A*03:01<br>– 0/1                                                                              |
| 41 | TTYMDTFRR  | 66923 | 9  | 229-237 | 3 publications, tested in 5 T cell assays and 6 MHC ligand assays | T cell assays:<br>IFN $\gamma$ release – 0/5<br>MHC ligand assays:<br>HLA-A*03:01 – 1/1<br>HLA-A*11:01 – 1/1<br>HLA-A*31:01 – 1/1<br>HLA-A*33:01 – 1/1<br>HLA-A*68:01 – 1/1<br>Patr-A*01:01 – 1/1 |
| 42 | TVVRDFENY  | 67201 | 9  | 103-111 | Tested in 5 MHC ligand assays                                     | HLA-A*11:01 – 1/1                                                                                                                                                                                 |

|    |             |       |    |         |                                                                    |                                                                                                                                                                                                  |
|----|-------------|-------|----|---------|--------------------------------------------------------------------|--------------------------------------------------------------------------------------------------------------------------------------------------------------------------------------------------|
|    |             |       |    |         |                                                                    | HLA-A*68:01 – 1/1<br>HLA-A*03:01 – 0/1<br>HLA-A*31:01 – 0/1<br>HLA-A*33:01 – 0/1                                                                                                                 |
| 43 | VII LAALFMY | 68993 | 10 | 193-202 | Tested in 5 MHC ligand assays                                      | HLA-A*03:01 – 1/1<br>HLA-A*11:01 – 1/1<br>HLA-A*31:01 – 0/1<br>HLA-A*33:01 – 0/1<br>HLA-A*68:01 – 0/1                                                                                            |
| 44 | VLSAATETY   | 69748 | 9  | 68-76   | 2 publications, tested in 2 T cell assays and 5 MHC ligand assays  | T cell assays:<br>IFN $\gamma$ release – 0/7<br>MHC ligand assays:<br>HLA-A*03:01 – 1/1<br>HLA-A*68:01 – 1/1<br>HLA-A*11:01 – 0/1<br>HLA-A*31:01 – 0/1<br>HLA-A*33:01 – 0/1                      |
| 45 | VPAMFTAAL   | 70248 | 9  | 87-95   | 9 publications, tested in 7 T cell assays and 24 MHC ligand assays | T cell assays:<br>IFN $\gamma$ release – 0/2<br>MHC ligand assays:<br>HLA-B*07:02 – 2/2<br>HLA-A*02:06 – 1/1<br>HLA-A*69:01 – 1/1<br>HLA-B*08:01 – 1/1<br>HLA-B*15:17 – 1/1<br>HLA-B*35:01 – 1/1 |

|    |            |       |    |         |                                                                    |                                                                                                                                                                                                                                                                                                                                                              |
|----|------------|-------|----|---------|--------------------------------------------------------------------|--------------------------------------------------------------------------------------------------------------------------------------------------------------------------------------------------------------------------------------------------------------------------------------------------------------------------------------------------------------|
|    |            |       |    |         |                                                                    | HLA-B*39:01 – 1/1<br>HLA-B*51:01 – 1/1<br>HLA-B7 – 1/1<br>HLA-A*01:01 – 0/1<br>HLA-A*02:01 – 0/1<br>HLA-A*03:01 – 0/1<br>HLA-A*11:01 – 0/1<br>HLA-A*30:01 – 0/1<br>HLA-A*31:01 – 0/1<br>HLA-B*15:01 – 0/1<br>HLA-B*27:05 – 0/1<br>HLA-B*40:01 – 0/1<br>HLA-B*46:01 – 0/1<br>HLA-B*48:01 – 0/1<br>HLA-B*57:01 – 0/1<br>HLA-B*58:01 – 0/1<br>HLA-C*05:01 – 0/1 |
| 46 | VVRDFENYVK | 71808 | 10 | 104-113 | 3 publications, tested in 5 T cell assays and 5 MHC ligand assays  | T cell assays:<br>IFN $\gamma$ release – 0/5<br>MHC ligand assays:<br>HLA-A*03:01 – 1/1<br>HLA-A*11:01 – 1/1<br>HLA-A*31:01 – 1/1<br>HLA-A*68:01 – 1/1<br>HLA-A*33:01 – 0/1                                                                                                                                                                                  |
| 47 | WTTYMDTFFR | 73163 | 10 | 228-237 | 3 publications, tested in 5 T cell assays and 18 MHC ligand assays | T cell assays:<br>IFN $\gamma$ release – 0/5                                                                                                                                                                                                                                                                                                                 |

|    |                       |       |    |         |                                                 |                                                                                                                                                                                                                                                                                                                                                                                            |
|----|-----------------------|-------|----|---------|-------------------------------------------------|--------------------------------------------------------------------------------------------------------------------------------------------------------------------------------------------------------------------------------------------------------------------------------------------------------------------------------------------------------------------------------------------|
|    |                       |       |    |         |                                                 | MHC ligand assays:<br>HLA-A*11:01 – 1/1<br>HLA-A*31:01 – 1/1<br>HLA-A*33:01 – 1/1<br>HLA-A*68:01 – 1/1<br>H2-Db – 0/1<br>H2-Dd – 0/1<br>H2-Kb – 0/1<br>HLA-A*02:01 – 0/1<br>HLA-A*02:02 – 0/1<br>HLA-A*02:03 – 0/1<br>HLA-A*02:06 – 0/1<br>HLA-A*03:01 – 0/1<br>HLA-A*68:02 – 0/1<br>HLA-B*07:02 – 0/1<br>HLA-B*35:01 – 0/1<br>HLA-B*51:01 – 0/1<br>HLA-B*53:01 – 0/1<br>HLA-B*54:01 – 0/1 |
| 48 | YMIVIGVIILAALFMYYAKRM | 75069 | 21 | 187-207 | Tested in 1 T cell assay and 1 MHC ligand assay | T cell assays:<br>IFN $\gamma$ release – 0/1<br>MHC ligand assays:<br>HLA-DRB1*01:01 – 1/1                                                                                                                                                                                                                                                                                                 |
| 49 | YSGLTPEQK             | 75745 | 9  | 76-84   | Tested in 5 MHC ligand assays                   | HLA-A*11:01 – 1/1<br>HLA-A*68:01 – 1/1<br>HLA-A*03:01 – 0/1<br>HLA-A*31:01 – 0/1                                                                                                                                                                                                                                                                                                           |

|    |                  |        |    |         |                               |                            |
|----|------------------|--------|----|---------|-------------------------------|----------------------------|
|    |                  |        |    |         |                               | HLA-A*33:01 – 0/1          |
| 50 | EQKAYVPAM        | 81769  | 9  | 82-90   | Tested in 1 MHC ligand assays | HLA-B*15:01 – 1/1          |
| 51 | TTKATTQIA        | 89748  | 9  | 167-175 | Tested in 1 MHC ligand assays | HLA-A*30:01 – 1/1          |
| 52 | AALFMYYAKRMLFTST | 139994 | 16 | 197-212 | Tested in 1 T cell assay      | IFN $\gamma$ release – 1/1 |
| 53 | ANKENVHWTTYMDTFF | 139998 | 16 | 221-236 | Tested in 1 T cell assay      | IFN $\gamma$ release – 1/1 |
| 54 | CNLTVKNMCSADADAQ | 140007 | 16 | 49-64   | Tested in 1 T cell assay      | IFN $\gamma$ release – 1/1 |
| 55 | DFFFRTSPMVIATTDM | 140016 | 16 | 233-248 | Tested in 1 T cell assay      | IFN $\gamma$ release – 1/1 |
| 56 | KATTQIAPRQVAGTGV | 140042 | 16 | 169-184 | Tested in 1 T cell assay      | IFN $\gamma$ release – 1/1 |
| 57 | KCDIEIGNFYIRQNHG | 140043 | 16 | 33-48   | Tested in 1 T cell assay      | IFN $\gamma$ release – 1/1 |
| 58 | KLEQEANASAQTKCDI | 140047 | 16 | 21-36   | Tested in 1 T cell assay      | IFN $\gamma$ release – 1/1 |
| 59 | KRMLFTSTNDKIKLIL | 140049 | 16 | 205-220 | Tested in 1 T cell assay      | IFN $\gamma$ release – 1/1 |
| 60 | MYYAKRMLFTSTNDKI | 140055 | 16 | 201-216 | Tested in 1 T cell assay      | IFN $\gamma$ release – 1/1 |
| 61 | NCAIKALMQLTTKATT | 140056 | 16 | 157-172 | Tested in 1 T cell assay      | IFN $\gamma$ release – 1/1 |
| 62 | NVHWTTYMDTFFRTSP | 140058 | 16 | 225-240 | Tested in 1 T cell assay      | IFN $\gamma$ release – 1/1 |
| 63 | QIAPRQVAGTGVQFYM | 140063 | 16 | 173-188 | Tested in 1 T cell assay      | IFN $\gamma$ release – 1/1 |
| 64 | QNVIIDECYGAPGSPT | 140065 | 16 | 129-144 | Tested in 1 T cell assay      | IFN $\gamma$ release – 1/1 |
| 65 | TTYMDTFFRTSPMVIA | 140073 | 16 | 229-244 | Tested in 1 T cell assay      | IFN $\gamma$ release – 1/1 |
| 66 | VIIAALFMYYAKRML  | 140076 | 16 | 193-208 | Tested in 1 T cell assay      | IFN $\gamma$ release – 1/1 |
| 67 | IGVIIAALFMYYAK   | 190248 | 15 | 191-205 | Tested in 2 MHC ligand assays | HLA-DRB1*01:01 – 2/2       |

**Table S10.** List of B cell epitopes (antigen M1R-M1R-L1R)

| M1R-M1R-L1R (MPXV, VARV, and VACV) – Consensus sequence                                                                                                                                                                                      | Predicted linear epitopes | Position |
|----------------------------------------------------------------------------------------------------------------------------------------------------------------------------------------------------------------------------------------------|---------------------------|----------|
| >Consensus/1-250 Percentage Identity Consensus<br>MGAAASIQTTVNTLSERISSKLEQEANASAQTKCDIEIGNFYIRQ<br>NHGCNITVKNMCSADADAQLDAVLSAATETYSGLTPEQKAYV<br>PAMFTAALNIQTSVNTVVRDFENYVKQTCNSSAVVDNKLKIQ<br>NVIIDECYGAPGSPTNLEFINTGSSKGNCAIKALMQLTTKATTQI | EANAS                     | 24-28    |
|                                                                                                                                                                                                                                              | QTSVNT                    | 97-102   |

|                                                                                |       |         |
|--------------------------------------------------------------------------------|-------|---------|
| APRQVAGTGVQFYMIVIGVILAALFMYAKRMLFTSTNDKIK<br>LILANKENVHWTTYMDTFFRTSPMIIATTDIQN | APRQV | 174-178 |
|--------------------------------------------------------------------------------|-------|---------|

**Table S11.** Molecular docking results of the final vaccine constructs with MHC-I

| Peptide    | Cluster Size | Center Weighted Score | Lowest Energy |
|------------|--------------|-----------------------|---------------|
| TLFPGDDDL  | 409          | -759.2                | -860.1        |
| NTLSERISSK | 198          | -575.0                | -596.6        |

**Table S12.** Molecular docking results of the final vaccine constructs with MHC-II

| Peptide         | Cluster Size | Center Weighted Score | Lowest Energy |
|-----------------|--------------|-----------------------|---------------|
| FFIVVATAAVCLLFI | 162          | -990.6                | -1074.9       |
| LSMITMSAFLIVRLN | 227          | -1013.4               | -1051.4       |
| ASYISCTANSWNVIP | 149          | -932.3                | -1096.5       |
| KIQNVIIDECY     | 174          | -960.8                | -960.8        |
